# Supplementary material for: Genome-Wide Identification and Characterization of Glycosyltransferase Family 47 in Cotton
Source: Front Genet. 2019 Sep 11;10:824. doi: 10.3389/fgene.2019.00824 (PMC6749837; doi:10.3389/fgene.2019.00824)
Supplement: Table S1 — Primer pairs used in the qRT-PCR analysis. [file Table_1.xlsx]

## Sheet: Sheet1
Supplementary Table 1. Primer pairs used in the qRT-PCR analysis
Gene name	Forward primers (5’ to 3’)	Reverse primers (5’ to 3’)
GhGT47_03	AGGGGTTCATGGACCGATACGA	CGATATTAGCACCGGGACGCAT
GhGT47_09	TCCAGTCCTGTTCGAACCCTCA	GACTTGAAGGGCAATGGCAAGC
GhGT47_10	GAGGTGGACACAATGCGTGCTA	GCATCTTCGAAGCCAACATCGC
GhGT47_11	CAATGCGCTTTATCGGGTCGTG	GCAAATCACGGATTTTGCCTCCC
GhGT47_37	AGTTGCTGGGAGGATTGCTTGG	GCCGGTTTTGCCTTCTCATTCG
GhGT47_39	TACTTCGTCCGTAACCGCCAAC	GCAGTCGAAAATTGACCTGCGG
GhGT47_40	GCTCCCTGTTCTGCTTACAGCC	CGGAAGGTGCCAAGTGTACTGT
GhGT47_51	CGGAGATATAACGGTGACCGGC	ATCGGCTATTATCACCGGCACG
GhGT47_58	CGAACCCTCAATCCAGAGGAAGC	AGGGCAATGGCAAACCAGTAGG
GhGT47_59	CTCGGTTTTGTTTGCAGGCTCC	TCGAAGCCTCTTCCGGCAAAAA
GhGT47_70	CAAGCACCCTTGTCAGGACGTT	CTCGATTCCCAGTCAACGGAGC
GhGT47_78	CTGACCACAAGAGGCCTCACAC	AGGGTCGATGAGGACCCAAAGT
GhGT47_89	AGATTTTCCGGTGGCAGGATCG	TGCCCCGGATCGAGTTCTGATA
GhGT47_93	ATCCCGTTTTACGCAGGACTCG	ATGCGTCCCATCGTCGTGAAAT
GhGT47_94	TTCCATCGCCACCGTTCAAACT	GGTGGTTTCTCCTTGGTCACCC
GhGT47_104	CGTGCCGGTGATAATAGCCGAT	GCAGGGTCCCACAGGTTTTTCT
GhGT47_105	TCAAGTCCTGTCCGAACCCTCA	GCATGCTCCAAAGTCATGTGGC
Gh-Histone3	TCAAGACTGATTTGCGTTTCCA	GCGCAAAGGTTGGTGTCTTC
