# Supplementary material for: Genome-Wide Identification and Characterization of Glycosyltransferase Family 47 in Cotton
Source: Front Genet. 2019 Sep 11;10:824. doi: 10.3389/fgene.2019.00824 (PMC6749837; doi:10.3389/fgene.2019.00824)
Supplement: Table S2 — Gene locus information for GT47s in Arabidopsis thaliana, Populus trichocarpa, G. arboreum, G. raimondii, G. hirsutum and G. barbadense. Gene location information was obtained from gene annotation files, and the locations of exostosin domains were determined using the online Simple Modular Architecture Research Tool (SMART). [file Table_2.xlsx]

## Sheet: Sheet1
Supplementary Table 2. Gene locus information for GT47s in Arabidopsis thaliana, Populus trichocarpa, G. arboreum, G. raimondii, G. hirsutum and G. barbadense. Gene location information was obtained from gene annotation files, and the locations of exostosin domains were determined using the online Simple Modular Architecture Research Tool (SMART)
Name	Gene ID	Chr.	Star	End	Direction	Location of exostosins domains
AtGT47_01	AT1G21480	At01	7518946	7521504	-	85-383
AtGT47_02	AT1G27440	At01	9529141	9531375	-	43-340
AtGT47_03	AT1G34270	At01	12492411	12494544	-	53-399
AtGT47_04	AT1G63450	At01	23531409	23534569	+	278-610
AtGT47_05	AT1G67410	At01	25251193	25253667	-	49-365
AtGT47_06	AT1G68470	At01	25676395	25678288	-	67-401
AtGT47_07	AT1G74680	At01	28059188	28061119	+	71-394
AtGT47_08	AT2G20370	At02	8791986	8794401	+	150-489
AtGT47_09	AT2G28110	At02	11977944	11979837	-	92-393
AtGT47_10	AT2G29040	At02	12472425	12474962	-	298-635
AtGT47_11	AT2G31990	At02	13611351	13613573	-	71-416
AtGT47_12	AT2G32740	At02	13886826	13888232	+	65-410
AtGT47_13	AT2G32750	At02	13889641	13891170	+	82-426
AtGT47_14	AT2G35100	At02	14793651	14795629	-	56-368
AtGT47_15	AT3G03650	At03	884133	886410	-	117-436
AtGT47_16	AT3G07620	At03	2433267	2434988	-	128-411
AtGT47_17	AT3G42180	At03	14324274	14328676	-	116-421
AtGT47_18	AT3G45400	At03	16651963	16653678	+	78-395
AtGT47_19	AT3G57630	At03	21339302	21343796	-	344-699
AtGT47_20	AT4G13990	At04	8084395	8086095	+	94-435
AtGT47_21	AT4G16745	At04	9411866	9414111	+	197-485
AtGT47_22	AT4G22580	At04	11889098	11890725	-	36-380
AtGT47_23	AT4G32790	At04	15812095	15814987	+	263-547
AtGT47_24	AT4G38040	At04	17867438	17869302	+	100-378
AtGT47_25	AT5G03795	At05	1007390	1010473	-	186-468
AtGT47_26	AT5G11130	At05	3542320	3544724	+	145-429
AtGT47_27	AT5G11610	At05	3735440	3738217	-	216-498
AtGT47_28	AT5G16890	At05	5551629	5554917	+	115-425
AtGT47_29	AT5G19670	At05	6646719	6649498	+	277-561
AtGT47_30	AT5G20260	At05	6836806	6839532	-	1-286
AtGT47_31	AT5G22940	At05	7676938	7679179	+	106-407
AtGT47_32	AT5G25310	At05	8784820	8787366	+	147-432
AtGT47_33	AT5G25820	At05	8997183	9000329	-	317-606
AtGT47_34	AT5G33290	At05	12558256	12562020	+	146-451
AtGT47_35	AT5G37000	At05	14618107	14620282	+	222-505
AtGT47_36	AT5G41250	At05	16501217	16502902	-	176-508
AtGT47_37	AT5G44930	At05	18138775	18142147	-	62-364
AtGT47_38	AT5G61840	At05	24839178	24841940	-	46-343
AtGT47_39	AT5G62220	At05	24988456	24990009	-	117-458
PtGT47_01	Potri.001G068100	Chr01	5428724	5432679	+	44-341
PtGT47_02	Potri.001G072500	Chr01	5756440	5758702	+	135-433
PtGT47_03	Potri.001G105300	Chr01	8390041	8391877	-	146-479
PtGT47_04	Potri.001G120800	Chr01	9729119	9730701	+	32-387
PtGT47_05	Potri.001G321000	Chr01	32574646	32576814	+	107-436
PtGT47_06	Potri.001G381900	Chr01	39774835	39776298	-	88-427
PtGT47_07	Potri.001G382200	Chr01	39792277	39793661	-	22-361
PtGT47_08	Potri.002G072300	Chr02	5002283	5005248	+	83-383
PtGT47_09	Potri.002G210000	Chr02	18008397	18011346	-	107-422
PtGT47_10	Potri.002G256200	Chr02	24549266	24552355	+	136-475
PtGT47_11	Potri.003G079000	Chr03	10698633	10707019	+	198-487
PtGT47_12	Potri.003G112200	Chr03	13575667	13577026	-	1-279
PtGT47_13	Potri.003G126000	Chr03	14693664	14694737	+	9-286
PtGT47_14	Potri.003G162000	Chr03	17296689	17300534	-	44-341
PtGT47_15	Potri.005G055000	Chr05	3899165	3900100	+	1-69
PtGT47_16	Potri.005G147500	Chr05	12994853	12999194	-	100-378
PtGT47_17	Potri.005G187400	Chr05	20482421	20485342	-	84-383
PtGT47_18	Potri.006G054800	Chr06	3999084	4007471	-	345-700
PtGT47_19	Potri.006G064600	Chr06	4744764	4747873	+	15-299
PtGT47_20	Potri.006G064700	Chr06	4751012	4753700	+	162-448
PtGT47_21	Potri.006G064800	Chr06	4758902	4763000	+	174-464
PtGT47_22	Potri.006G064900	Chr06	4765561	4768575	+	157-446
PtGT47_23	Potri.006G118000	Chr06	9313854	9318456	-	177-459
PtGT47_24	Potri.006G238900	Chr06	24806236	24809541	-	399-682
PtGT47_25	Potri.006G239000	Chr06	24812676	24815799	-	327-656
PtGT47_26	Potri.007G058400	Chr07	6272709	6277215	+	101-379
PtGT47_27	Potri.007G116800	Chr07	13746017	13748454	-	82-373
PtGT47_28	Potri.007G117600	Chr07	13783777	13786422	-	61-336
PtGT47_29	Potri.007G117800	Chr07	13789882	13792710	-	84-351;3-102
PtGT47_30	Potri.007G118100	Chr07	13797775	13799325	-	1-312
PtGT47_31	Potri.008G034500	Chr08	1903259	1906518	+	53-371
PtGT47_32	Potri.008G060500	Chr08	3652684	3654227	+	40-290
PtGT47_33	Potri.009G006500	Chr09	1204125	1206845	+	104-406
PtGT47_34	Potri.009G032500	Chr09	4287250	4288977	-	139-479
PtGT47_35	Potri.010G197900	Chr10	19064235	19065546	-	170-276;41-178
PtGT47_36	Potri.012G091600	Chr12	11860755	11862372	+	57-239
PtGT47_37	Potri.012G109200	Chr12	13200704	13204887	-	48-331
PtGT47_38	Potri.012G109600	Chr12	13218346	13222712	+	48-345
PtGT47_39	Potri.012G124600	Chr12	14354997	14358305	-	90-403
PtGT47_40	Potri.012G130700	Chr12	14743865	14746532	+	209-551
PtGT47_41	Potri.012G135800	Chr12	15185342	15185781	-	1-69
PtGT47_42	Potri.013G067400	Chr13	5391476	5394803	+	115-433
PtGT47_43	Potri.013G116200	Chr13	12976652	12979494	+	57-403
PtGT47_44	Potri.014G147800	Chr14	11295196	11296669	-	49-389
PtGT47_45	Potri.014G170900	Chr14	13773213	13774835	+	64-346
PtGT47_46	Potri.014G171100	Chr14	13792095	13793971	+	174-456
PtGT47_47	Potri.015G087900	Chr15	11062723	11065555	+	61-360
PtGT47_48	Potri.015G116700	Chr15	13203164	13204817	-	2-276
PtGT47_49	Potri.015G124800	Chr15	13834878	13838512	-	89-399
PtGT47_50	Potri.015G132600	Chr15	14292512	14295110	+	115-457
PtGT47_51	Potri.018G025200	Chr18	2004968	2006336	+	1-286
PtGT47_52	Potri.018G025400	Chr18	2013627	2014736	+	1-286
PtGT47_53	Potri.018G043700	Chr18	3790383	3794736	+	373-658
PtGT47_54	Potri.018G085400	Chr18	11219801	11223426	+	310-594
PtGT47_55	Potri.018G085500	Chr18	11225191	11230092	+	349-633
PtGT47_56	Potri.018G124800	Chr18	14786337	14792168	+	383-685
PtGT47_57	Potri.018G124900	Chr18	14794888	14797562	+	131-416
PtGT47_58	Potri.018G125000	Chr18	14800300	14804865	+	180-470
PtGT47_59	Potri.019G036500	Chr19	4131839	4135281	+	137-415
PtGT47_60	Potri.019G044600	Chr19	5293132	5296166	+	111-427
PtGT47_61	Potri.019G049800	Chr19	7440168	7454071	+	115-425
PtGT47_62	Potri.019G086800	Chr19	11884151	11887099	+	52-398
PtGT47_63	Potri.T071700	scaffold_76	155537	168065	+	114-424
GaGT47_01	Ga01G2694	AA01	111270303	111271652	-	39-388
GaGT47_02	Ga02G0341	AA02	4086437	4088998	+	118-396
GaGT47_03	Ga02G1043	AA02	82036619	82039389	-	48-364
GaGT47_04	Ga02G1619	AA02	97337221	97339617	-	173-282
GaGT47_05	Ga02G1620	AA02	97340418	97344623	-	203-485
GaGT47_06	Ga03G0717	AA03	11077317	11079345	-	53-400
GaGT47_07	Ga03G0785	AA03	12968915	12972309	+	77-375
GaGT47_08	Ga03G1701	AA03	113534190	113576377	-	45-269;266-327
GaGT47_09	Ga03G2054	AA03	126996076	126999200	-	45-342
GaGT47_10	Ga03G2774	AA03	135444072	135445499	+	80-423
GaGT47_11	Ga03G2784	AA03	135500366	135502990	-	92-404
GaGT47_12	Ga05G0270	AA05	2334430	2338076	+	303-570
GaGT47_13	Ga05G0598	AA05	5388630	5391538	-	147-432
GaGT47_14	Ga05G0599	AA05	5392948	5395263	-	112-411
GaGT47_15	Ga05G1004	AA05	8697658	8699924	-	307-594;591-616
GaGT47_16	Ga05G1134	AA05	9906960	9908577	-	98-400
GaGT47_17	Ga05G3424	AA05	50260485	50263703	-	48-362
GaGT47_18	Ga05G3878	AA05	89242307	89243638	-	43-385
GaGT47_19	Ga06G0538	AA06	7791629	7794965	+	147-431
GaGT47_20	Ga06G1050	AA06	35032841	35035490	-	311-594
GaGT47_21	Ga07G0082	AA07	965541	967685	+	308-592
GaGT47_22	Ga07G1074	AA07	15613507	15615437	+	197-514
GaGT47_23	Ga07G1717	AA07	41058704	41060443	-	121-460
GaGT47_24	Ga07G1859	AA07	57050605	57052744	+	147-430
GaGT47_25	Ga07G1860	AA07	57159947	57161808	+	193-476
GaGT47_26	Ga08G1074	AA08	48922058	48923798	-	66-421
GaGT47_27	Ga08G1147	AA08	60779909	60783070	+	115-433
GaGT47_28	Ga08G1972	AA08	115598366	115602185	-	38-125;167-455
GaGT47_29	Ga08G2138	AA08	119940705	119942312	+	147-481
GaGT47_30	Ga08G2545	AA08	125519650	125522026	+	104-382
GaGT47_31	Ga08G2614	AA08	126287141	126291626	+	118-429
GaGT47_32	Ga09G1417	AA09	70429337	70440552	-	345-700
GaGT47_33	Ga09G1635	AA09	73783409	73786876	-	237-519
GaGT47_34	Ga09G2310	AA09	80801245	80802696	-	86-428
GaGT47_35	Ga09G2335	AA09	80992912	80994504	+	101-441
GaGT47_36	Ga10G0246	AA10	3417606	3418652	-	40-295
GaGT47_37	Ga10G1540	AA10	83955615	83957063	-	81-424
GaGT47_38	Ga10G1541	AA10	83984416	83985840	-	74-405
GaGT47_39	Ga10G1549	AA10	84429961	84431520	-	93-434
GaGT47_40	Ga10G1596	AA10	87943744	87945011	+	132-296;17-140
GaGT47_41	Ga11G1441	AA11	37925565	37927135	-	102-420
GaGT47_42	Ga11G2476	AA11	106005356	106007030	+	171-438
GaGT47_43	Ga11G2633	AA11	108510126	108511853	+	116-455
GaGT47_44	Ga11G4045	AA11	123731641	123733044	-	67-408
GaGT47_45	Ga12G0152	AA12	1251668	1253221	+	116-459
GaGT47_46	Ga12G0879	AA12	8643009	8645826	-	48-345
GaGT47_47	Ga12G1443	AA12	20810427	20812751	+	45-340
GaGT47_48	Ga13G2022	AA13	113326978	113329226	-	95-410
GaGT47_49	Ga13G2086	AA13	115053814	115068921	+	792-1070
GaGT47_50	Ga13G2087	AA13	115073670	115075277	+	140-418
GaGT47_51	Ga13G2323	AA13	118556968	118559974	+	508-791
GaGT47_52	Ga13G2490	AA13	120214525	120217325	-	105-404
GaGT47_53	Ga13G2817	AA13	123685858	123687466	-	80-381
GrGT47_01	Gorai.001G007900	DD01	719327	722037	+	308-592
GrGT47_02	Gorai.001G111200	DD01	12919333	12921694	+	211-533
GrGT47_03	Gorai.001G182200	DD01	27866544	27873965	-	179-400
GrGT47_04	Gorai.001G189500	DD01	31040795	31043029	-	191-474
GrGT47_05	Gorai.001G189600	DD01	31060830	31063229	-	147-430
GrGT47_06	Gorai.002G184100	DD02	48851438	48854982	-	48-364
GrGT47_07	Gorai.002G244500	DD02	60863949	60866523	-	166-275
GrGT47_08	Gorai.002G244600	DD02	60867000	60871561	-	203-485
GrGT47_09	Gorai.003G036900	DD03	3891431	3894542	+	110-388
GrGT47_10	Gorai.003G052700	DD03	8042929	8048591	-	115-425
GrGT47_11	Gorai.003G169500	DD03	44011615	44013160	+	39-388
GrGT47_12	Gorai.004G108000	DD04	22071842	22073766	-	134-421
GrGT47_13	Gorai.004G113300	DD04	26047604	26051765	-	114-432
GrGT47_14	Gorai.004G196900	DD04	51730997	51734643	-	176-464
GrGT47_15	Gorai.004G211300	DD04	54415195	54416818	+	147-481
GrGT47_16	Gorai.004G250600	DD04	58801386	58804021	+	138-416
GrGT47_17	Gorai.004G257200	DD04	59342055	59346871	+	116-427
GrGT47_18	Gorai.005G075900	DD05	8658722	8664848	-	53-400
GrGT47_19	Gorai.005G082700	DD05	10128625	10133146	+	77-375
GrGT47_20	Gorai.005G168600	DD05	49453706	49456698	-	45-361
GrGT47_21	Gorai.005G197500	DD05	57174629	57177072	-	43-340
GrGT47_22	Gorai.005G266400	DD05	63928702	63930761	+	80-423
GrGT47_23	Gorai.005G267400	DD05	63985483	63988656	-	92-404
GrGT47_24	Gorai.006G138400	DD06	39488656	39495968	-	345-700
GrGT47_25	Gorai.006G159600	DD06	41872371	41876668	-	241-523
GrGT47_26	Gorai.006G224200	DD06	47613078	47614693	-	86-428
GrGT47_27	Gorai.006G226500	DD06	47788143	47789912	+	101-441
GrGT47_28	Gorai.007G009300	DD07	729655	731730	+	67-407
GrGT47_29	Gorai.007G150100	DD07	12706614	12709234	-	116-455
GrGT47_30	Gorai.007G164400	DD07	14457188	14459100	-	171-438
GrGT47_31	Gorai.007G252800	DD07	40449981	40452218	-	102-420
GrGT47_32	Gorai.008G156000	DD08	41658527	41661495	-	45-342
GrGT47_33	Gorai.008G211000	DD08	49713254	49716760	+	48-345
GrGT47_34	Gorai.008G283000	DD08	55913150	55915522	-	116-459
GrGT47_35	Gorai.009G027100	DD09	2064046	2067038	+	303-586
GrGT47_36	Gorai.009G059200	DD09	4257335	4260963	-	147-432
GrGT47_37	Gorai.009G059300	DD09	4262284	4264601	-	112-410
GrGT47_38	Gorai.009G098600	DD09	7140017	7142502	-	320-607
GrGT47_39	Gorai.009G111000	DD09	8105596	8108162	-	98-400
GrGT47_40	Gorai.009G332700	DD09	34595706	34599231	-	47-361
GrGT47_41	Gorai.009G374500	DD09	50922160	50923724	+	114-449
GrGT47_42	Gorai.010G060600	DD10	7257260	7260604	+	147-431
GrGT47_43	Gorai.010G107300	DD10	19851956	19856313	-	311-594
GrGT47_44	Gorai.011G152000	DD11	25837677	25840179	+	93-434
GrGT47_45	Gorai.011G152600	DD11	26002357	26004288	+	81-424
GrGT47_46	Gorai.011G269900	DD11	60160797	60162347	+	40-295
GrGT47_47	Gorai.011G272600	DD11	60463119	60464987	-	1-252
GrGT47_48	Gorai.013G193500	DD13	49483408	49485464	+	166-443
GrGT47_49	Gorai.013G193600	DD13	49491618	49494481	+	140-418
GrGT47_50	Gorai.013G196700	DD13	50129301	50132196	+	95-410
GrGT47_51	Gorai.013G219000	DD13	53881361	53885372	+	511-794
GrGT47_52	Gorai.013G235500	DD13	55352897	55355787	-	105-403
GrGT47_53	Gorai.013G269400	DD13	58103192	58105615	-	80-381
GhGT47_01	Ghir_A01G015360.1	At01	99609027	99612556	-	1-309
GhGT47_02	Ghir_A01G020340.1	At01	115524881	115525871	-	2-175
GhGT47_03	Ghir_A01G020350.1	At01	115529568	115534171	-	203-477
GhGT47_04	Ghir_A02G006410.1	At02	10035851	10038350	-	53-400
GhGT47_05	Ghir_A02G006990.1	At02	11636479	11640691	+	77-375
GhGT47_06	Ghir_A02G016050.1	At02	103617295	103620391	-	118-396
GhGT47_07	Ghir_A03G001540.1	At03	2381677	2384195	-	39-388
GhGT47_08	Ghir_A03G014190.1	At03	91954243	91957156	-	45-361
GhGT47_09	Ghir_A03G017040.1	At03	104261678	104264217	-	43-340
GhGT47_10	Ghir_A03G023420.1	At03	112826430	112828492	+	80-423
GhGT47_11	Ghir_A03G023520.1	At03	112882860	112886028	-	92-404
GhGT47_12	Ghir_A04G003760.1	At04	8583851	8585692	-	43-385
GhGT47_13	Ghir_A05G002630.1	At05	2505262	2508191	+	303-585
GhGT47_14	Ghir_A05G005830.1	At05	5455290	5458483	-	112-397
GhGT47_15	Ghir_A05G005840.1	At05	5459759	5462074	-	112-406
GhGT47_16	Ghir_A05G009710.1	At05	8789364	8791755	-	324-611;608-633
GhGT47_17	Ghir_A05G010940.1	At05	9881155	9882768	-	97-229;214-372
GhGT47_18	Ghir_A05G032120.1	At05	47348559	47352214	-	48-362
GhGT47_19	Ghir_A06G005550.1	At06	9659122	9674168	+	405-689
GhGT47_20	Ghir_A06G009790.1	At06	33630629	33634880	-	311-594
GhGT47_21	Ghir_A07G000790.1	At07	853757	856563	+	308-592
GhGT47_22	Ghir_A07G010690.1	At07	17280520	17282468	+	197-514
GhGT47_23	Ghir_A07G016300.1	At07	40672489	40675446	-	121-460
GhGT47_24	Ghir_A07G017360.1	At07	51464235	51466315	-	185-468
GhGT47_25	Ghir_A07G017370.1	At07	51565923	51568295	-	146-429
GhGT47_26	Ghir_A08G009640.1	At08	42727868	42730032	+	75-202;186-359
GhGT47_27	Ghir_A08G010260.1	At08	54502708	54506884	-	115-433
GhGT47_28	Ghir_A08G017610.1	At08	110089808	110091853	-	53-149;186-474
GhGT47_29	Ghir_A08G019010.1	At08	113617941	113619538	+	135-450
GhGT47_30	Ghir_A08G022700.1	At08	118764810	118767495	+	138-416
GhGT47_31	Ghir_A09G013280.1	At09	67793676	67806481	-	345-700
GhGT47_32	Ghir_A09G015230.1	At09	70920278	70924431	-	237-519
GhGT47_33	Ghir_A09G021580.1	At09	77885182	77886633	-	86-415
GhGT47_34	Ghir_A09G021810.1	At09	78071716	78073308	+	101-441
GhGT47_35	Ghir_A10G013060.1	At10	69569232	69570833	-	109-450
GhGT47_36	Ghir_A10G013070.1	At10	69599786	69602350	-	124-449
GhGT47_37	Ghir_A10G013120.1	At10	69895470	69897034	-	93-440
GhGT47_38	Ghir_A10G022840.1	At10	111754090	111757083	+	40-188;181-277
GhGT47_39	Ghir_A11G000840.1	At11	785911	788090	+	67-408
GhGT47_40	Ghir_A11G014230.1	At11	15606173	15609232	-	116-455
GhGT47_41	Ghir_A11G015680.1	At11	18013333	18015730	-	171-452
GhGT47_42	Ghir_A11G024720.1	At11	90796012	90798142	-	23-87;102-420
GhGT47_43	Ghir_A12G015150.1	At12	86941747	86944356	-	45-342
GhGT47_44	Ghir_A12G020610.1	At12	99070330	99073976	+	48-345
GhGT47_45	Ghir_A12G027670.1	At12	106272655	106275225	-	116-459
GhGT47_46	Ghir_A13G017060.1	At13	98303602	98306541	-	95-410
GhGT47_47	Ghir_A13G017380.1	At13	99247330	99248933	-	139-401
GhGT47_48	Ghir_A13G017390.1	At13	99253608	99255696	-	131-409
GhGT47_49	Ghir_A13G019900.1	At13	103106031	103110476	+	508-791
GhGT47_50	Ghir_A13G021350.1	At13	104597911	104612385	-	294-675
GhGT47_51	Ghir_A13G024590.1	At13	108118978	108120583	-	80-382
GhGT47_52	Ghir_D01G016320.1	Dt01	48503608	48507185	-	1-309
GhGT47_53	Ghir_D01G021860.1	Dt01	61200559	61202536	-	1-279
GhGT47_54	Ghir_D01G021870.1	Dt01	61205057	61209656	-	203-485
GhGT47_55	Ghir_D02G006800.1	Dt02	9460294	9462779	-	53-400
GhGT47_56	Ghir_D02G007440.1	Dt02	10823824	10827772	+	77-375
GhGT47_57	Ghir_D02G015550.1	Dt02	54864883	54867780	-	45-361
GhGT47_58	Ghir_D02G018300.1	Dt02	62399173	62401345	-	43-340
GhGT47_59	Ghir_D02G024820.1	Dt02	69579475	69581371	+	80-423
GhGT47_60	Ghir_D02G024930.1	Dt02	69641866	69644501	-	79-391
GhGT47_61	Ghir_D02G024960.1	Dt02	69651485	69654247	-	92-404
GhGT47_62	Ghir_D02G024970.1	Dt02	69651608	69654247	-	92-404
GhGT47_63	Ghir_D03G003500.1	Dt03	3932614	3935153	+	110-376
GhGT47_64	Ghir_D03G005200.1	Dt03	8212938	8218427	-	115-425
GhGT47_65	Ghir_D03G017530.1	Dt03	50579548	50582212	+	2-239
GhGT47_66	Ghir_D05G002770.1	Dt05	2395666	2398613	+	253-536
GhGT47_67	Ghir_D05G005890.1	Dt05	4775293	4778372	-	138-423
GhGT47_68	Ghir_D05G005900.1	Dt05	4780031	4782390	-	112-410
GhGT47_69	Ghir_D05G009440.1	Dt05	7843756	7846570	-	326-665
GhGT47_70	Ghir_D05G010670.1	Dt05	9003318	9005956	-	79-381
GhGT47_71	Ghir_D05G032030.1	Dt05	37460639	37464499	-	80-394
GhGT47_72	Ghir_D05G035430.1	Dt05	55260988	55262319	+	43-385
GhGT47_73	Ghir_D06G005580.1	Dt06	7940333	7943553	+	147-431
GhGT47_74	Ghir_D06G010150.1	Dt06	20814758	20819510	-	311-537
GhGT47_75	Ghir_D07G000790.1	Dt07	842410	845100	+	308-592
GhGT47_76	Ghir_D07G010750.1	Dt07	13631021	13632996	+	211-549
GhGT47_77	Ghir_D07G016600.1	Dt07	28262945	28265986	-	121-460
GhGT47_78	Ghir_D07G017880.1	Dt07	33690302	33693402	-	191-474
GhGT47_79	Ghir_D07G017890.1	Dt07	33711355	33713747	-	147-430
GhGT47_80	Ghir_D08G009800.1	Dt08	23605611	23607555	-	134-411
GhGT47_81	Ghir_D08G010220.1	Dt08	29562411	29565587	-	111-429
GhGT47_82	Ghir_D08G018470.1	Dt08	57615662	57618127	-	218-506
GhGT47_83	Ghir_D08G023610.1	Dt08	65168977	65171418	+	138-403
GhGT47_84	Ghir_D08G024220.1	Dt08	65787391	65792410	+	116-427
GhGT47_85	Ghir_D09G012770.1	Dt09	40370666	40379105	-	345-700
GhGT47_86	Ghir_D09G014670.1	Dt09	42860654	42864924	-	242-524
GhGT47_87	Ghir_D09G021090.1	Dt09	49284865	49286457	+	101-441
GhGT47_88	Ghir_D10G014100.1	Dt10	24641350	24642359	-	1-213
GhGT47_89	Ghir_D10G014530.1	Dt10	26095311	26098028	+	93-434
GhGT47_90	Ghir_D10G014590.1	Dt10	26295934	26297382	+	81-414
GhGT47_91	Ghir_D10G025300.1	Dt10	65106311	65108797	+	40-190;181-277
GhGT47_92	Ghir_D10G025520.1	Dt10	65462072	65471249	-	65-374
GhGT47_93	Ghir_D11G000890.1	Dt11	775307	777580	+	67-408
GhGT47_94	Ghir_D11G014260.1	Dt11	13574335	13576062	-	116-455
GhGT47_95	Ghir_D11G015690.1	Dt11	15323603	15325514	-	43-132;171-438
GhGT47_96	Ghir_D11G024940.1	Dt11	50437714	50439969	-	102-420
GhGT47_97	Ghir_D12G015370.1	Dt12	46482314	46484616	-	45-354
GhGT47_98	Ghir_D12G027700.1	Dt12	61381540	61383976	-	68-411
GhGT47_99	Ghir_D13G017780.1	Dt13	54562621	54565493	-	95-410
GhGT47_100	Ghir_D13G018100.1	Dt13	55167241	55168927	-	141-419
GhGT47_101	Ghir_D13G018110.1	Dt13	55176291	55178352	-	131-409
GhGT47_102	Ghir_D13G020680.1	Dt13	58421997	58426132	+	510-793
GhGT47_103	Ghir_D13G022230.1	Dt13	60055926	60058632	-	105-404
GhGT47_104	Ghir_D13G025370.1	Dt13	63104918	63108280	-	80-381
GhGT47_105	Ghir_D12G029310.1	ScAtffolDt145	30139	33970	+	48-345
GbGT47_01	Gbar_A01G015760.1	At01	98039873	98043384	-	1-309
GbGT47_02	Gbar_A01G020820.1	At01	113520692	113522716	-	14-292
GbGT47_03	Gbar_A01G020830.1	At01	113525197	113529850	-	203-485
GbGT47_04	Gbar_A02G006230.1	At02	9902820	9905285	-	53-400
GbGT47_05	Gbar_A02G006820.1	At02	11578133	11582390	+	77-375
GbGT47_06	Gbar_A02G015740.1	At02	95753647	95756752	-	118-396
GbGT47_07	Gbar_A03G001530.1	At03	1841214	1843694	-	39-388
GbGT47_08	Gbar_A03G014410.1	At03	85376424	85379293	-	45-361
GbGT47_09	Gbar_A03G017060.1	At03	96809990	96812624	-	1-269
GbGT47_10	Gbar_A03G023590.1	At03	105147514	105149390	+	80-423
GbGT47_11	Gbar_A03G023690.1	At03	105207016	105212223	-	92-404
GbGT47_12	Gbar_A04G003430.1	At04	7723624	7725203	-	43-385
GbGT47_13	Gbar_A05G009150.1	At05	8287251	8289900	-	324-663
GbGT47_14	Gbar_A05G010340.1	At05	9436550	9438829	-	98-381
GbGT47_15	Gbar_A05G031100.1	At05	45584570	45587787	-	48-193;180-347
GbGT47_16	Gbar_A06G005370.1	At06	9239345	9254364	+	412-696
GbGT47_17	Gbar_A06G009670.1	At06	31614020	31616802	-	311-594
GbGT47_18	Gbar_A07G000800.1	At07	943177	945880	+	308-592
GbGT47_19	Gbar_A07G010440.1	At07	16852150	16854092	+	197-511
GbGT47_20	Gbar_A07G016320.1	At07	39616377	39619436	-	121-460
GbGT47_21	Gbar_A07G017390.1	At07	48755367	48757385	-	185-468
GbGT47_22	Gbar_A07G017400.1	At07	48847262	48854378	-	147-430
GbGT47_23	Gbar_A08G009790.1	At08	41301979	41303718	+	66-421
GbGT47_24	Gbar_A08G010390.1	At08	53500232	53504391	-	115-433
GbGT47_25	Gbar_A08G019560.1	At08	111068005	111069612	+	147-481
GbGT47_26	Gbar_A08G023460.1	At08	115990753	115993175	+	138-416
GbGT47_27	Gbar_A08G024080.1	At08	116679305	116684088	+	118-429
GbGT47_28	Gbar_A09G013340.1	At09	64055610	64069326	-	345-700
GbGT47_29	Gbar_A09G015370.1	At09	67096767	67100781	-	237-519
GbGT47_30	Gbar_A09G021710.1	At09	73763096	73764885	-	86-428
GbGT47_31	Gbar_A09G021940.1	At09	73951920	73953512	+	101-441
GbGT47_32	Gbar_A10G013980.1	At10	66157886	66160033	-	132-475
GbGT47_33	Gbar_A10G013990.1	At10	66184577	66186151	-	124-455
GbGT47_34	Gbar_A10G014040.1	At10	66488277	66491131	-	93-434
GbGT47_35	Gbar_A10G014360.1	At10	69784856	69785534	+	12-193
GbGT47_36	Gbar_A10G024040.1	At10	107286494	107288040	+	40-295
GbGT47_37	Gbar_A11G000420.1	At11	419581	421568	+	67-408
GbGT47_38	Gbar_A11G013890.1	At11	14854828	14856746	-	116-455
GbGT47_39	Gbar_A11G015300.1	At11	17043841	17045550	-	171-452
GbGT47_40	Gbar_A11G024060.1	At11	81292956	81294796	-	23-87;102-420
GbGT47_41	Gbar_A12G015230.1	At12	81642707	81645141	-	44-341
GbGT47_42	Gbar_A12G020720.1	At12	94086930	94090561	+	48-345
GbGT47_43	Gbar_A12G027540.1	At12	100816280	100818660	-	116-459
GbGT47_44	Gbar_A13G017670.1	At13	99415902	99418741	-	95-410
GbGT47_45	Gbar_A13G017940.1	At13	100454295	100455902	-	140-377;378-401
GbGT47_46	Gbar_A13G017950.1	At13	100460519	100462611	-	131-409
GbGT47_47	Gbar_A13G024810.1	At13	109015702	109018463	-	80-381
GbGT47_48	Gbar_D01G016350.1	Dt01	48637692	48641504	-	1-309
GbGT47_49	Gbar_D01G021970.1	Dt01	61052192	61055601	-	31-309
GbGT47_50	Gbar_D01G021980.1	Dt01	61062222	61066295	-	203-485
GbGT47_51	Gbar_D02G007160.1	Dt02	9693350	9695766	-	53-400
GbGT47_52	Gbar_D02G007790.1	Dt02	11051539	11055413	+	77-375
GbGT47_53	Gbar_D02G016160.1	Dt02	52929690	52932639	-	45-361
GbGT47_54	Gbar_D02G018870.1	Dt02	60370700	60373261	-	43-340
GbGT47_55	Gbar_D02G025410.1	Dt02	67454681	67456501	+	80-423
GbGT47_56	Gbar_D02G025510.1	Dt02	67527116	67530202	-	92-404
GbGT47_57	Gbar_D03G003470.1	Dt03	3866849	3869954	+	110-388
GbGT47_58	Gbar_D03G005070.1	Dt03	8068502	8073581	-	115-425
GbGT47_59	Gbar_D03G017000.1	Dt03	49390788	49393359	+	39-388
GbGT47_60	Gbar_D05G002600.1	Dt05	2257230	2260151	+	253-535
GbGT47_61	Gbar_D05G005800.1	Dt05	4651363	4654571	-	147-432
GbGT47_62	Gbar_D05G005810.1	Dt05	4656061	4658463	-	112-410
GbGT47_63	Gbar_D05G009610.1	Dt05	7763249	7766016	-	326-665
GbGT47_64	Gbar_D05G010930.1	Dt05	8891380	8894620	-	98-400
GbGT47_65	Gbar_D05G032010.1	Dt05	37584890	37588664	-	48-362
GbGT47_66	Gbar_D05G035620.1	Dt05	55466210	55467763	+	118-459
GbGT47_67	Gbar_D06G005580.1	Dt06	7364816	7368117	+	147-431
GbGT47_68	Gbar_D06G010170.1	Dt06	20043787	20046574	-	311-594
GbGT47_69	Gbar_D07G000810.1	Dt07	819050	821739	+	308-592
GbGT47_70	Gbar_D07G010820.1	Dt07	13647608	13649583	+	211-549
GbGT47_71	Gbar_D07G016740.1	Dt07	28013059	28016147	-	121-460
GbGT47_72	Gbar_D07G017950.1	Dt07	33292894	33294900	-	191-474
GbGT47_73	Gbar_D07G017960.1	Dt07	33312940	33315414	-	147-430
GbGT47_74	Gbar_D08G010190.1	Dt08	23332694	23334443	-	134-421
GbGT47_75	Gbar_D08G010730.1	Dt08	28462193	28465354	-	114-432
GbGT47_76	Gbar_D08G018980.1	Dt08	54884052	54888024	-	218-506
GbGT47_77	Gbar_D08G020480.1	Dt08	57640896	57642742	+	133-457
GbGT47_78	Gbar_D08G024150.1	Dt08	62330076	62332540	+	138-416
GbGT47_79	Gbar_D08G024720.1	Dt08	62881950	62886752	+	115-426
GbGT47_80	Gbar_D09G013100.1	Dt09	38984205	38992195	-	345-700
GbGT47_81	Gbar_D09G015130.1	Dt09	41506846	41510920	-	242-524
GbGT47_82	Gbar_D09G021480.1	Dt09	47794135	47795957	-	86-428
GbGT47_83	Gbar_D09G021690.1	Dt09	47972663	47974234	+	94-434
GbGT47_84	Gbar_D10G013800.1	Dt10	24331399	24333020	-	1-224
GbGT47_85	Gbar_D10G014200.1	Dt10	25761125	25763737	+	93-434
GbGT47_86	Gbar_D10G014250.1	Dt10	25973925	25975373	+	81-414
GbGT47_87	Gbar_D10G024980.1	Dt10	62696060	62696988	+	1-90;86-239
GbGT47_88	Gbar_D11G000800.1	Dt11	747098	749290	+	67-407
GbGT47_89	Gbar_D11G014650.1	Dt11	13334133	13336912	-	116-455
GbGT47_90	Gbar_D11G016080.1	Dt11	15037891	15039568	-	43-131;170-434
GbGT47_91	Gbar_D11G025120.1	Dt11	47625189	47627490	-	102-420
GbGT47_92	Gbar_D12G015220.1	Dt12	43283495	43286333	-	73-370
GbGT47_93	Gbar_D12G020940.1	Dt12	51696125	51699812	+	48-345
GbGT47_94	Gbar_D12G027430.1	Dt12	57800658	57803087	-	116-459
GbGT47_95	Gbar_D13G017640.1	Dt13	51140504	51143423	-	95-410
GbGT47_96	Gbar_D13G017960.1	Dt13	51720365	51721973	-	141-419
GbGT47_97	Gbar_D13G017970.1	Dt13	51730001	51732052	-	160-438
GbGT47_98	Gbar_D13G020660.1	Dt13	54993331	54996344	+	324-607
GbGT47_99	Gbar_D13G022150.1	Dt13	56539814	56556706	-	385-684
GbGT47_100	Gbar_D13G025420.1	Dt13	60106303	60109766	-	75-377
GbGT47_101	Gbar_A05G042600.1	ScAtffolDt2300	84403	87374	+	303-585
GbGT47_102	Gbar_A08G027740.1	ScAtffolDt3	109389	111418	-	182-470
GbGT47_103	Gbar_A13G025390.1	ScAtffolDt2739_ERROPOS718940	21912	39934	+	135-517
GbGT47_104	Gbar_A13G025420.1	ScAtffolDt2739_ERROPOS718940	60293	63055	+	105-404
GbGT47_105	Gbar_A13G025440.1	ScAtffolDt2739_ERROPOS718940	79345	82102	+	105-404
GbGT47_106	Gbar_A13G025520.1	ScAtffolDt2839	36177	40466	+	508-791
GbGT47_107	Gbar_D10G027110.1	ScAtffolDt1000	37329	38339	+	1-224
GbGT47_108	Gbar_Scaffold2469G000050.1	ScAtffolDt2469	21021	23388	+	112-411
GbGT47_109	Gbar_Scaffold2469G000060.1	ScAtffolDt2469	24586	27821	+	147-432
