# Supplementary material for: Genome-Wide Identification and Characterization of Glycosyltransferase Family 47 in Cotton
Source: Front Genet. 2019 Sep 11;10:824. doi: 10.3389/fgene.2019.00824 (PMC6749837; doi:10.3389/fgene.2019.00824)
Supplement: Table S4 — The Ka/Ks ratios of duplicated gene pairs between the A and D subgenomes of allotetraploid cottons and their corresponding ancestral A and D diploid genomes, respectively. The homologous gene pairs were identified by the results of BLAST and collinearity analysis. When both Ka and Ks were equal to 0, Ka /Ks was considered equal to 1. When only Ks was equal to 0, it was marked as Ka>>Ks. [file Table_4.xlsx]

## Sheet: Sheet1
Supplementary Table 4. The Ka/Ks ratios of duplicated gene pairs between the A and D subgenomes of allotetraploid cottons and their corresponding ancestral A and D diploid genomes, respectively. The homologous gene pairs were identified by the results of BLAST and collinearity analysis. When both Ka and Ks were equal to 0, Ka /Ks was considered equal to 1. When only Ks was equal to 0, it was mark…
Seq_1	Seq_2	Ka	Ks	Ka/Ks		Seq_1	Seq_2	Ka	Ks	Ka/Ks
GaGT47_01	GhGT47_07	0	0.00993392	0		GrGT47_01	GhGT47_75	0.00610414	0.0206159	0.296089
							GbGT47_69	0.00406574	0.0205845	0.197515
GaGT47_02	GhGT47_06	0.000980713	0	Ka>>Ks		GrGT47_02	GhGT47_76	0.0108876	0.0105514	1.03186
	GbGT47_06	0.000980713	0.00650763	0.150702			GbGT47_70	0.0101855	0.01056	0.964541
GaGT47_04	GhGT47_03	0.464646	2.8626	0.162316		GrGT47_03
							GbGT47_71	0.0415676	0.0572547	0.726011
GaGT47_05						GrGT47_04	GhGT47_78	0.00331126	0.00814488	0.406546
	GbGT47_02	0.201928	2.32662	0.0867903			GbGT47_72	0.00331126	0.00814488	0.406546
GaGT47_06	GhGT47_04	0.00366189	0.0118932	0.307898		GrGT47_06	GhGT47_52	0.00114177	0.00790001	0.144528
	GbGT47_04	0.00366133	0.0118991	0.307698			GbGT47_48	0.00228528	0.00790001	0.289276
GaGT47_07	GhGT47_05	0	0.0125987	0		GrGT47_07	GhGT47_53	0.0444776	0.129954	0.342257
	GbGT47_05	0.000960615	0.0125921	0.076287			GbGT47_49	0.0382662	0.101901	0.375525
GaGT47_08	GhGT47_08	0.0213098	0.0327722	0.650241		GrGT47_09	GhGT47_63	0.00204918	0.0138412	0.148049
	GbGT47_08	0.0201806	0.0327325	0.616531			GbGT47_57	0.00199601	0.0100113	0.199376
GaGT47_09	GhGT47_09	0.044728	0.0479078	0.933625		GrGT47_10	GhGT47_64	0.0111702	0.00836829	1.33482
	GbGT47_09	0	0	1			GbGT47_58	0.00769566	0.00829884	0.927318
GaGT47_10	GhGT47_10	0.00542375	0.00959246	0.565418		GrGT47_11	GhGT47_65	0.00571908	0.0204878	0.279145
	GbGT47_10	0.00542294	0.0128243	0.422866			GbGT47_59	0.00481118	0.0199734	0.240879
GaGT47_11	GhGT47_11	0.00274474	0	Ka>>Ks		GrGT47_12	GhGT47_80	0.00526595	0.0107851	0.488262
	GbGT47_11	0.0391349	0.0496977	0.787459			GbGT47_74	0	0.00629594	0
GaGT47_12	GhGT47_13	0.0132246	0.0260682	0.50731		GrGT47_13	GhGT47_81	0.000877321	0.00883663	0.0992824
							GbGT47_75	0.000871713	0.00879346	0.099132
GaGT47_13	GhGT47_14	0.00290628	0.0129001	0.225291		GrGT47_14	GhGT47_82	0.0584301	0.090176	0.647956
GaGT47_14	GhGT47_15	0.00100393	0.00331584	0.302769		GrGT47_15
							GbGT47_77	0.0115743	0.015798	0.732645
GaGT47_15	GhGT47_16	0.00238747	0.00649472	0.367601		GrGT47_16	GhGT47_83	0.00670663	0.00672839	0.996766
	GbGT47_13	0.00238759	0.00432278	0.552327			GbGT47_78	0.00371288	0.00650058	0.571161
GaGT47_16	GhGT47_17	0.0040428	0.00343348	1.17746		GrGT47_17	GhGT47_84	0.0557319	0.0932486	0.597669
	GbGT47_14	0.00494888	0	Ka>>Ks			GbGT47_79	0.00257622	0.0169739	0.151776
GaGT47_17	GhGT47_18	0.002026	0	Ka>>Ks		GrGT47_18	GhGT47_55	0.00366553	0.00887366	0.41308
	GbGT47_15	0.00314961	0.00345026	0.912861			GbGT47_51	0	0.00294118	0
GaGT47_18	GhGT47_12	0.00290745	0.0136756	0.212601		GrGT47_19	GhGT47_56	0.0038511	0.003125	1.23235
							GbGT47_52	0.0038511	0.003125	1.23235
GaGT47_19	GhGT47_26	0.328643	1.67552	0.196144		GrGT47_20	GhGT47_57	0.00204255	0.00326976	0.62468
	GbGT47_16	0.129945	0.209526	0.620187			GbGT47_53	0.00204273	0.00655205	0.311769
GaGT47_20	GhGT47_20	0.00599071	0.00711468	0.842022		GrGT47_21	GhGT47_58	0	0.0140684	0
	GbGT47_17	0.00532212	0.00950508	0.559924			GbGT47_54	0	0.00700122	0
GaGT47_21	GhGT47_21	0.00338334	0.0206514	0.163831		GrGT47_22	GhGT47_59	0.00361446	0.0160091	0.225775
	GbGT47_18	0.00474256	0.0206277	0.229912			GbGT47_55	0.00542825	0.00956442	0.567546
GaGT47_22	GhGT47_22	0.00916266	0.0220366	0.415793		GrGT47_23	GhGT47_60	0.0187257	0.0433115	0.432349
	GbGT47_19	0.0102729	0.023328	0.440367			GbGT47_56	0	0.0028777	0
GaGT47_23	GhGT47_23	0.00221702	0.0132104	0.167824		GrGT47_24	GhGT47_85	0.00271567	0.00375118	0.723951
	GbGT47_20	0.00295621	0.0105659	0.279789			GbGT47_80	0.00678674	0.00779481	0.870674
GaGT47_24	GhGT47_24	0.387005	NaN	NaN		GrGT47_25	GhGT47_86	0.00377597	0.019795	0.190754
							GbGT47_81	0.00226387	0.0248059	0.0912633
GaGT47_27	GhGT47_27	0.00523562	0.0146776	0.356709		GrGT47_26
							GbGT47_82	0.00354427	0.0191245	0.185326
GaGT47_28	GhGT47_28	0.0458343	0.0596357	0.768572		GrGT47_27	GhGT47_87	0.00325248	0.0112731	0.288517
							GbGT47_83	0.0199421	0.0410169	0.486193
GaGT47_29	GhGT47_29	0.0302603	0.0411919	0.734618		GrGT47_28	GhGT47_93	0.00556331	0.0190789	0.291594
	GbGT47_25	0.0015949	0.0144374	0.11047			GbGT47_88	0	0.00631583	0
GaGT47_30	GhGT47_30	0.0193949	0.0207034	0.936799		GrGT47_29	GhGT47_94	0.00449159	0.0183978	0.244138
	GbGT47_26	0.0204163	0.024363	0.838002			GbGT47_89	0.00524412	0.0130836	0.400816
GaGT47_31						GrGT47_30	GhGT47_95	0.00895385	0.0261038	0.34301
	GbGT47_27	0.00342173	0.00834888	0.409843			GbGT47_90	0.00852215	0.0251135	0.339345
GaGT47_32	GhGT47_31	0.00162933	0.00374241	0.435369		GrGT47_31	GhGT47_96	0.00171013	0.00312989	0.546387
	GbGT47_28	0.00217323	0.00562064	0.386651			GbGT47_91	0.00171013	0.00312989	0.546387
GaGT47_33	GhGT47_32	0.00302992	0.00249066	1.21651		GrGT47_32	GhGT47_97	0.0148402	0.0174884	0.848572
	GbGT47_29	0.00302992	0.00249066	1.21651			GbGT47_92	0.00210231	0.00694449	0.302731
GaGT47_34	GhGT47_33	0.000906892	0.00326798	0.277509		GrGT47_33
	GbGT47_30	0.0026533	0.0031679	0.837559			GbGT47_93	0.00104094	0	Ka>>Ks
GaGT47_35	GhGT47_34	0.00324259	0	Ka>>Ks		GrGT47_34	GhGT47_98	0.0263096	0.0682226	0.385643
	GbGT47_31	0.00242948	0	Ka>>Ks			GbGT47_94	0.00419406	0.0286705	0.146285
GaGT47_36	GhGT47_38	0.038548	0.056038	0.687891		GrGT47_35	GhGT47_66	0.00517116	0.0101524	0.509352
	GbGT47_36	0.00501307	0.0124269	0.403404			GbGT47_60	0.00518137	0.0178732	0.289896
GaGT47_37	GhGT47_35	0.00559704	0.00339751	1.64739		GrGT47_36	GhGT47_67	0.00918988	0.0183964	0.499547
	GbGT47_32	0.00264901	0.00321716	0.823399			GbGT47_61	0.00811855	0.0179964	0.451122
GaGT47_39	GhGT47_37	0.00886772	0.0167053	0.530832		GrGT47_37	GhGT47_68	0.00378998	0	Ka>>Ks
							GbGT47_62	0.00474197	0.0031389	1.51071
GaGT47_40						GrGT47_38	GhGT47_69	0.00234616	0.0214262	0.109499
	GbGT47_35	0.118647	0.154841	0.766248			GbGT47_63	0.00293456	0.0149206	0.196679
GaGT47_41	GhGT47_42	0.00600132	0.00313235	1.91592		GrGT47_39	GhGT47_70	0.00197661	0.013552	0.145853
							GbGT47_64	0.00094518	0.00976153	0.096827
GaGT47_42	GhGT47_41	0.00354349	0	Ka>>Ks		GrGT47_40	GhGT47_71	0.0030444	0.00670583	0.453993
	GbGT47_39	0.00265487	0	Ka>>Ks			GbGT47_65	0.00406195	0.00670583	0.605735
GaGT47_43	GhGT47_40	0.00298842	0.00522878	0.571534		GrGT47_41	GhGT47_72	0.0336648	0.0894637	0.376296
	GbGT47_38	0.0158992	0.0473664	0.335664			GbGT47_66	0.0293233	0.065242	0.449454
GaGT47_44	GhGT47_39	0	0	1		GrGT47_42	GhGT47_73	0.00819805	0.0117823	0.695795
	GbGT47_37	0	0	1			GbGT47_67	0.00545705	0.0177261	0.307854
GaGT47_45	GhGT47_45	0.00167504	0.0141915	0.118031		GrGT47_43	GhGT47_74	0.00480162	0.0112758	0.425835
	GbGT47_43	0.00167504	0.0170623	0.0981719			GbGT47_68	0.00599504	0.00947693	0.632593
GaGT47_46	GhGT47_44	0	0.0104775	0		GrGT47_44	GhGT47_89	0.00622626	0.0192841	0.322869
	GbGT47_42	0	0.00696869	0			GbGT47_85	0.00622626	0.0192841	0.322869
GaGT47_47	GhGT47_43	0.0476019	0.0512664	0.928521		GrGT47_45	GhGT47_90	0.00817323	0.00650411	1.25663
GaGT47_48	GhGT47_46	0.00352734	0.0160263	0.220098		GrGT47_46	GhGT47_91	0.0376455	0.0406311	0.926521
	GbGT47_44	0.00352734	0.0127935	0.275714			GbGT47_87	0.020596	0.0261446	0.787772
GaGT47_49	GhGT47_48	0.028278	0.0675347	0.418717		GrGT47_47	GhGT47_92	0.0143061	0.00548449	2.60846
GaGT47_50	GhGT47_47	0.00944894	0.0131872	0.716526		GrGT47_48	GhGT47_100	0.344517	2.46159	0.139957
							GbGT47_96	0.325734	2.37654	0.137062
GaGT47_51	GhGT47_49	0.00203364	0.00913949	0.222511		GrGT47_50	GhGT47_99	0.0044053	0.00640345	0.687957
							GbGT47_95	0.00819743	0.0236973	0.345922
GaGT47_52	GhGT47_50	0.0944276	0.16327	0.578351		GrGT47_51	GhGT47_102	0.0255187	0.0402365	0.634218
							GbGT47_98	0.00651895	0.00941928	0.692086
GaGT47_53	GhGT47_51	0.0198971	0.0241419	0.824171		GrGT47_52	GhGT47_103	0.0115415	0.043845	0.263233
	GbGT47_47	0.00198906	0.00660434	0.301175			GbGT47_99	0.0934251	0.18094	0.516331
						GrGT47_53	GhGT47_104	0.00198446	0.00665562	0.298163
							GbGT47_100	0.00100117	0.0067077	0.149256
