# Supplementary material for: Genome-Wide Identification and Characterization of Glycosyltransferase Family 47 in Cotton
Source: Front Genet. 2019 Sep 11;10:824. doi: 10.3389/fgene.2019.00824 (PMC6749837; doi:10.3389/fgene.2019.00824)
Supplement: Table S5 — Detailed physicochemical characteristics of GT47 proteins of A. thaliana, P. trichocarpa, G. arboreum, G. raimondii, G. hirsutum and G. barbadense. The pI and MW were computed by the Compute pI/Mw tool. The N-terminal signal peptide and transmembrane helices were predicted by the SignalP 4.1 server and the TMHMM v.2.0 server, respectively. Subcellular localizations of GT47 proteins were predicted by DeepLoc. [file Table_5.xlsx]

## Sheet: Sheet1
Supplementary Table 5. Detailed physicochemical characteristics of GT47 proteins of A. thaliana, P. trichocarpa, G. arboreum, G. raimondii, G. hirsutum and G. barbadense. The pI and MW were computed by the Compute pI/Mw tool. The N-terminal signal peptide and transmembrane helices were predicted by the SignalP 4.1 server and the TMHMM v.2.0 server, respectively. Subcellular localizations of GT47 …
Gene Name	Grouping	Length (AA)	MW (Da)	PI	Subcellular Location	Protein Type	Transmembrane Helices	SignalPeptide
AtGT47_01	Group E	462	52835.5	9.38	Golgi apparatus	Membrane	PredHel=0	N
AtGT47_02	Group D	412	46843.1	6.6	Endoplasmic reticulum	Membrane	PredHel=0	Y
AtGT47_03	Group B	477	53885.6	8.96	Golgi apparatus	Membrane	PredHel=1	N
AtGT47_04	Group A	664	76562.3	8.73	Golgi apparatus	Membrane	PredHel=1	N
AtGT47_05	Group B	430	49755.9	6.68	Endoplasmic reticulum	Membrane	PredHel=1	N
AtGT47_06	Group A	455	52904.6	8.18	Golgi apparatus	Membrane	PredHel=1	N
AtGT47_07	Group B	461	52659	8.93	Golgi apparatus	Membrane	PredHel=1	N
AtGT47_08	Group A	619	70743.6	8.34	Golgi apparatus	Membrane	PredHel=1	N
AtGT47_09	Group D	448	51694.2	9.29	Golgi apparatus	Membrane	PredHel=1	N
AtGT47_10	Group A	730	85146.6	8.42	Golgi apparatus	Membrane	PredHel=1	N
AtGT47_11	Group A	479	54787.9	9.65	Golgi apparatus	Membrane	PredHel=1	N
AtGT47_12	Group A	468	54837.1	9.11	Golgi apparatus	Membrane	PredHel=0	N
AtGT47_13	Group A	509	59135.4	8.93	Golgi apparatus	Membrane	PredHel=1	N
AtGT47_14	Group B	447	50782.3	9.12	Golgi apparatus	Membrane	PredHel=1	N
AtGT47_15	Group B	499	57145.3	9.33	Golgi apparatus	Membrane	PredHel=1	N
AtGT47_16	Group C	459	53334.4	8.3	Golgi apparatus	Membrane	PredHel=1	N
AtGT47_17	Group C	470	54268.1	9.13	Endoplasmic reticulum	Membrane	PredHel=1	N
AtGT47_18	Group B	475	54447.2	8.97	Golgi apparatus	Membrane	PredHel=1	N
AtGT47_19	Group F	793	90931.7	6	Cell membrane	Membrane	PredHel=1	N
AtGT47_20	Group A	521	60991.1	5.66	Golgi apparatus	Membrane	PredHel=1	N
AtGT47_21	Group C	542	62987.2	9.67	Golgi apparatus	Membrane	PredHel=1	N
AtGT47_22	Group A	435	50360.8	7.61	Endoplasmic reticulum	Membrane	PredHel=1	Y
AtGT47_23	Group C	593	68632.1	8.53	Golgi apparatus	Membrane	PredHel=1	N
AtGT47_24	Group C	425	48963	8.65	Endoplasmic reticulum	Membrane	PredHel=0	N
AtGT47_25	Group C	518	58572.3	9.26	Golgi apparatus	Membrane	PredHel=1	N
AtGT47_26	Group C	480	55363.4	8.03	Endoplasmic reticulum	Membrane	PredHel=0	N
AtGT47_27	Group C	546	63089.9	9.55	Golgi apparatus	Membrane	PredHel=1	N
AtGT47_28	Group B	511	58080.6	9.31	Endoplasmic reticulum	Membrane	PredHel=1	N
AtGT47_29	Group C	610	70381.1	9.57	Golgi apparatus	Membrane	PredHel=1	N
AtGT47_30	Group C	334	38677.8	9.17	Cytoplasm	Soluble	PredHel=0	N
AtGT47_31	Group D	469	53808.9	9.5	Endoplasmic reticulum	Membrane	PredHel=1	N
AtGT47_32	Group C	480	55974	9.09	Golgi apparatus	Membrane	PredHel=1	N
AtGT47_33	Group C	654	73526.2	9.52	Golgi apparatus	Membrane	PredHel=1	N
AtGT47_34	Group C	500	56600.1	9.54	Golgi apparatus	Membrane	PredHel=1	N
AtGT47_35	Group C	554	63740.1	9.48	Golgi apparatus	Membrane	PredHel=1	N
AtGT47_36	Group A	561	65207.6	8.83	Golgi apparatus	Membrane	PredHel=1	N
AtGT47_37	Group B	443	50996.8	9.49	Golgi apparatus	Membrane	PredHel=1	N
AtGT47_38	Group D	415	47194.6	6.76	Endoplasmic reticulum	Membrane	PredHel=0	Y
AtGT47_39	Group A	517	59645.5	8.67	Endoplasmic reticulum	Membrane	PredHel=0	N
PtGT47_01	Group D	413	47033.3	6.37	Endoplasmic reticulum	Soluble	PredHel=0	Y
PtGT47_02	Group C	482	56153.4	9.6	Plastid	Membrane	PredHel=1	N
PtGT47_03	Group A	533	61043.8	8.07	Golgi apparatus	Membrane	PredHel=1	N
PtGT47_04	Group A	449	51661	6.33	Endoplasmic reticulum	Soluble	PredHel=0	Y
PtGT47_05	Group A	519	59571.9	6.48	Golgi apparatus	Membrane	PredHel=1	N
PtGT47_06	Group A	487	55754.9	8.98	Golgi apparatus	Membrane	PredHel=1	N
PtGT47_07	Group A	421	48156.9	8.42	Cytoplasm	Soluble	PredHel=0	N
PtGT47_08	Group E	460	52764.6	9.16	Golgi apparatus	Membrane	PredHel=0	N
PtGT47_09	Group B	490	55859.5	9.69	Golgi apparatus	Membrane	PredHel=1	N
PtGT47_10	Group A	598	68003.9	7.55	Golgi apparatus	Membrane	PredHel=1	N
PtGT47_11	Group C	538	62303.9	9.71	Golgi apparatus	Membrane	PredHel=1	N
PtGT47_12	Group A	341	39054.7	6.1	Mitochondrion	Soluble	PredHel=0	N
PtGT47_13	Group A	331	38299.3	5.18	Extracellular	Soluble	PredHel=0	N
PtGT47_14	Group D	413	47191.4	6.6	Endoplasmic reticulum	Membrane	PredHel=0	Y
PtGT47_15	Group B	90	10457.9	4.99	Mitochondrion	Soluble	PredHel=0	N
PtGT47_16	Group C	425	49033	9.05	Endoplasmic reticulum	Membrane	PredHel=0	N
PtGT47_17	Group ?	460	52877.7	9.24	Golgi apparatus	Membrane	PredHel=0	N
PtGT47_18	Group F	793	90022	5.97	Cell membrane	Membrane	PredHel=1	N
PtGT47_19	Group C	348	40798.1	8.68	Cytoplasm	Soluble	PredHel=1	N
PtGT47_20	Group C	497	57087.5	9.49	Endoplasmic reticulum	Membrane	PredHel=1	N
PtGT47_21	Group C	512	58587.3	9.29	Endoplasmic reticulum	Membrane	PredHel=1	N
PtGT47_22	Group C	494	56808.7	9.85	Endoplasmic reticulum	Membrane	PredHel=0	N
PtGT47_23	Group C	515	58188.8	8.7	Golgi apparatus	Membrane	PredHel=1	N
PtGT47_24	Group C	731	82627.1	8.18	Golgi apparatus	Membrane	PredHel=2	N
PtGT47_25	Group C	705	79944	7.67	Golgi apparatus	Membrane	PredHel=1	N
PtGT47_26	Group C	426	48844.8	8.32	Endoplasmic reticulum	Membrane	PredHel=1	N
PtGT47_27	Group C	420	49470.2	8.86	Mitochondrion	Soluble	PredHel=1	N
PtGT47_28	Group C	384	44673.2	6.28	Golgi apparatus	Membrane	PredHel=1	N
PtGT47_29	Group C	400	46827	6.62	Cytoplasm	Soluble	PredHel=0	N
PtGT47_30	Group C	359	42096.3	6.79	Cytoplasm	Soluble	PredHel=0	N
PtGT47_31	Group B	439	50634	8.92	Endoplasmic reticulum	Membrane	PredHel=1	N
PtGT47_32	Group C	345	39342.1	7.61	Endoplasmic reticulum	Membrane	PredHel=0	Y
PtGT47_33	Group D	462	53516.6	9.59	Golgi apparatus	Membrane	PredHel=1	N
PtGT47_34	Group A	575	67659.5	8.83	Cytoplasm	Soluble	PredHel=0	N
PtGT47_35	Group C	330	37808.5	8.85	Endoplasmic reticulum	Membrane	PredHel=0	Y
PtGT47_36	Group C	245	28306.3	6.84	Mitochondrion	Soluble	PredHel=0	N
PtGT47_37	Group D	403	46071.1	5.96	Endoplasmic reticulum	Membrane	PredHel=1	N
PtGT47_38	Group D	417	47580.8	6.02	Endoplasmic reticulum	Membrane	PredHel=1	N
PtGT47_39	Group B	479	54670.7	8.66	Golgi apparatus	Membrane	PredHel=1	N
PtGT47_40	Group A	610	70543.6	8.97	Golgi apparatus	Membrane	PredHel=1	N
PtGT47_41	Group B	90	10371.9	4.82	Cytoplasm	Soluble	PredHel=0	N
PtGT47_42	Group B	509	57928.1	8.94	Golgi apparatus	Membrane	PredHel=1	N
PtGT47_43	Group B	481	54682.9	8.91	Endoplasmic reticulum	Membrane	PredHel=1	N
PtGT47_44	Group A	484	56147.7	7.59	Plastid	Soluble	PredHel=0	N
PtGT47_45	Group C	395	45984.9	8.3	Mitochondrion	Soluble	PredHel=0	N
PtGT47_46	Group C	505	57640.1	9.14	Golgi apparatus	Membrane	PredHel=2	N
PtGT47_47	Group C	407	47250.7	7.99	Mitochondrion	Soluble	PredHel=1	N
PtGT47_48	Group D	347	39562.5	6.11	Mitochondrion	Soluble	PredHel=0	N
PtGT47_49	Group B	478	54446.3	8.3	Golgi apparatus	Membrane	PredHel=1	N
PtGT47_50	Group A	516	59804	9.15	Golgi apparatus	Membrane	PredHel=1	N
PtGT47_51	Group C	335	38955.7	8.11	Cytoplasm	Soluble	PredHel=0	N
PtGT47_52	Group C	334	39009.2	9.23	Cytoplasm	Soluble	PredHel=0	N
PtGT47_53	Group C	707	78931.4	7.34	Golgi apparatus	Membrane	PredHel=1	N
PtGT47_54	Group C	643	73780.9	8.86	Golgi apparatus	Membrane	PredHel=1	N
PtGT47_55	Group C	682	78487.9	9.06	Golgi apparatus	Membrane	PredHel=1	N
PtGT47_56	Group C	734	84235.9	9.34	Cell membrane	Membrane	PredHel=7	N
PtGT47_57	Group C	466	53304.1	8.92	Endoplasmic reticulum	Membrane	PredHel=1	N
PtGT47_58	Group C	521	59546.2	9.26	Endoplasmic reticulum	Membrane	PredHel=1	N
PtGT47_59	Group C	472	54480.3	9.45	Golgi apparatus	Membrane	PredHel=1	N
PtGT47_60	Group B	505	57682.2	9.25	Golgi apparatus	Membrane	PredHel=1	N
PtGT47_61	Group B	505	57814.6	9.2	Golgi apparatus	Membrane	PredHel=1	N
PtGT47_62	Group B	476	54054.2	9.26	Endoplasmic reticulum	Membrane	PredHel=1	N
PtGT47_63	Group B	504	57713.4	9.15	Golgi apparatus	Membrane	PredHel=1	N
GaGT47_01	Group A	449	51506.6	6.28	Endoplasmic reticulum	Membrane	PredHel=0	Y
GaGT47_02	Group C	443	50756.1	8.78	Endoplasmic reticulum	Membrane	PredHel=1	N
GaGT47_03	Group B	432	49983.5	9.02	Endoplasmic reticulum	Membrane	PredHel=1	N
GaGT47_04	Group C	291	33705.6	9.87	Golgi apparatus	Membrane	PredHel=1	N
GaGT47_05	Group C	541	61505.7	9.21	Golgi apparatus	Membrane	PredHel=1	N
GaGT47_06	Group B	478	53823.6	8.97	Golgi apparatus	Membrane	PredHel=1	N
GaGT47_07	Group E	454	52019.8	9.16	Endoplasmic reticulum	Membrane	PredHel=0	N
GaGT47_08	Group B	578	67135.4	8.42	Endoplasmic reticulum	Membrane	PredHel=1	N
GaGT47_09	Group D	414	47032.3	6.56	Endoplasmic reticulum	Membrane	PredHel=0	N
GaGT47_10	Group A	475	54365.1	8.47	Golgi apparatus	Membrane	PredHel=1	N
GaGT47_11	Group B	481	54065.7	8.68	Endoplasmic reticulum	Membrane	PredHel=1	N
GaGT47_12	Group C	606	68463.6	9.41	Golgi apparatus	Membrane	PredHel=0	N
GaGT47_13	Group C	484	56093.4	9.02	Golgi apparatus	Membrane	PredHel=1	N
GaGT47_14	Group C	460	53469	8.94	Endoplasmic reticulum	Membrane	PredHel=1	N
GaGT47_15	Group A	714	83965.8	6.4	Golgi apparatus	Membrane	PredHel=1	N
GaGT47_16	Group D	456	53288.7	9.83	Golgi apparatus	Membrane	PredHel=1	N
GaGT47_17	Group B	430	49723.4	9.01	Endoplasmic reticulum	Membrane	PredHel=1	N
GaGT47_18	Group A	443	51912.2	8.97	Plastid	Soluble	PredHel=0	N
GaGT47_19	Group C	482	54774.2	9.28	Endoplasmic reticulum	Membrane	PredHel=1	N
GaGT47_20	Group C	644	73768.6	5.92	Golgi apparatus	Membrane	PredHel=0	N
GaGT47_21	Group C	641	73298.1	9.43	Golgi apparatus	Membrane	PredHel=1	N
GaGT47_22	Group A	594	68712.4	8.7	Golgi apparatus	Membrane	PredHel=1	N
GaGT47_23	Group A	579	66726.1	6.51	Golgi apparatus	Membrane	PredHel=1	N
GaGT47_24	Group C	479	55629.2	9.14	Golgi apparatus	Membrane	PredHel=1	N
GaGT47_25	Group C	529	60443.1	8.88	Endoplasmic reticulum	Membrane	PredHel=1	N
GaGT47_26	Group C	467	53917.2	9.58	Endoplasmic reticulum	Membrane	PredHel=1	Y
GaGT47_27	Group B	498	56593.5	9.39	Golgi apparatus	Membrane	PredHel=1	N
GaGT47_28	Group C	506	58607.2	9.7	Cytoplasm	Soluble	PredHel=0	N
GaGT47_29	Group A	535	61543.7	7.9	Golgi apparatus	Membrane	PredHel=1	N
GaGT47_30	Group C	429	50030.8	5.94	Plastid	Soluble	PredHel=0	N
GaGT47_31	Group B	511	58420.4	9.29	Golgi apparatus	Membrane	PredHel=1	N
GaGT47_32	Group F	793	90239	5.65	Cell membrane	Membrane	PredHel=1	N
GaGT47_33	Group F	575	64749.9	8.82	Golgi apparatus	Membrane	PredHel=1	N
GaGT47_34	Group C	483	56066.5	9.12	Golgi apparatus	Membrane	PredHel=1	N
GaGT47_35	Group A	530	61179.2	9.25	Golgi apparatus	Membrane	PredHel=1	N
GaGT47_36	Group A	348	39489.1	5.64	Endoplasmic reticulum	Membrane	PredHel=0	Y
GaGT47_37	Group C	482	56103.4	9.21	Golgi apparatus	Membrane	PredHel=1	N
GaGT47_38	Group A	463	53556.4	9.37	Golgi apparatus	Membrane	PredHel=1	N
GaGT47_39	Group A	519	59649.8	5.93	Golgi apparatus	Membrane	PredHel=2	N
GaGT47_40	Group A	361	42165.6	9.62	Cytoplasm	Soluble	PredHel=0	N
GaGT47_41	Group A	497	56851.1	8.94	Golgi apparatus	Membrane	PredHel=1	N
GaGT47_42	Group B	491	56296.5	8.76	Endoplasmic reticulum	Membrane	PredHel=1	N
GaGT47_43	Group C	575	66384.6	7.07	Golgi apparatus	Membrane	PredHel=1	N
GaGT47_44	Group A	467	54160.6	8.58	Golgi apparatus	Membrane	PredHel=2	N
GaGT47_45	Group A	517	59425.8	9.18	Golgi apparatus	Membrane	PredHel=2	N
GaGT47_46	Group A	417	47637.1	6.22	Endoplasmic reticulum	Membrane	PredHel=0	Y
GaGT47_47	Group D	412	46761.4	8.57	Endoplasmic reticulum	Membrane	PredHel=1	Y
GaGT47_48	Group D	484	55696.7	9.53	Golgi apparatus	Membrane	PredHel=1	N
GaGT47_49	Group B	1120	128246	8.42	Golgi apparatus	Membrane	PredHel=7	N
GaGT47_50	Group C	474	54274.2	8.44	Golgi apparatus	Membrane	PredHel=1	N
GaGT47_51	Group C	840	94844.4	5.28	Golgi apparatus	Membrane	PredHel=1	N
GaGT47_52	Group C	452	52210.5	9.49	Golgi apparatus	Membrane	PredHel=1	N
GaGT47_53	Group C	437	50333.9	9.57	Golgi apparatus	Membrane	PredHel=1	N
GrGT47_01	Group C	641	73400.1	9.43	Golgi apparatus	Membrane	PredHel=1	N
GrGT47_02	Group A	621	71509.4	7.84	Golgi apparatus	Membrane	PredHel=1	N
GrGT47_03	Group A	1257	139356	8.72	Cell membrane	Membrane	PredHel=1	N
GrGT47_04	Group C	527	60235.8	8.92	Endoplasmic reticulum	Membrane	PredHel=1	N
GrGT47_05	Group C	479	55641.1	8.93	Golgi apparatus	Membrane	PredHel=1	N
GrGT47_06	Group B	432	49949.4	8.92	Endoplasmic reticulum	Membrane	PredHel=1	N
GrGT47_07	Group C	284	32842.8	9.71	Endoplasmic reticulum	Membrane	PredHel=1	N
GrGT47_08	Group C	541	61380.6	9.22	Golgi apparatus	Membrane	PredHel=1	N
GrGT47_09	Group C	435	50067.3	8.78	Endoplasmic reticulum	Membrane	PredHel=1	N
GrGT47_10	Group B	513	58592.4	9.26	Golgi apparatus	Membrane	PredHel=1	N
GrGT47_11	Group A	449	51507.6	6.17	Endoplasmic reticulum	Membrane	PredHel=0	Y
GrGT47_12	Group C	470	54218.5	9.59	Endoplasmic reticulum	Membrane	PredHel=1	Y
GrGT47_13	Group B	497	56611.5	9.35	Golgi apparatus	Membrane	PredHel=1	N
GrGT47_14	Group C	515	59684.5	9.73	Cytoplasm	Soluble	PredHel=0	N
GrGT47_15	Group A	535	61477.6	7.89	Golgi apparatus	Membrane	PredHel=1	N
GrGT47_16	Group C	463	53760.2	6.25	Golgi apparatus	Membrane	PredHel=1	N
GrGT47_17	Group B	509	58280.3	9.43	Golgi apparatus	Membrane	PredHel=1	N
GrGT47_18	Group B	478	53832.7	9.15	Golgi apparatus	Membrane	PredHel=1	N
GrGT47_19	Group E	454	52072	9.16	Golgi apparatus	Membrane	PredHel=0	N
GrGT47_20	Group B	429	49626.3	9.56	Endoplasmic reticulum	Membrane	PredHel=1	N
GrGT47_21	Group D	412	47032.4	7.1	Endoplasmic reticulum	Membrane	PredHel=0	Y
GrGT47_22	Group A	475	54447.2	8.6	Golgi apparatus	Membrane	PredHel=1	N
GrGT47_23	Group B	481	54233.9	8.55	Endoplasmic reticulum	Membrane	PredHel=1	N
GrGT47_24	Group F	793	90319.3	5.67	Cell membrane	Membrane	PredHel=1	N
GrGT47_25	Group C	579	65159.3	8.96	Golgi apparatus	Membrane	PredHel=1	N
GrGT47_26	Group A	483	56035.3	9.03	Golgi apparatus	Membrane	PredHel=1	N
GrGT47_27	Group A	530	61183.2	9.3	Golgi apparatus	Membrane	PredHel=1	N
GrGT47_28	Group A	467	54315.8	8.46	Endoplasmic reticulum	Membrane	PredHel=2	N
GrGT47_29	Group A	575	66341.8	8.34	Golgi apparatus	Membrane	PredHel=1	N
GrGT47_30	Group C	491	56182.4	8.52	Endoplasmic reticulum	Membrane	PredHel=1	N
GrGT47_31	Group B	497	57082.4	8.85	Golgi apparatus	Membrane	PredHel=1	N
GrGT47_32	Group D	414	47259.8	8.05	Endoplasmic reticulum	Membrane	PredHel=1	Y
GrGT47_33	Group D	417	47589	6.22	Endoplasmic reticulum	Membrane	PredHel=0	Y
GrGT47_34	Group A	517	59426.8	9.29	Golgi apparatus	Membrane	PredHel=2	N
GrGT47_35	Group C	635	72212.2	9.5	Golgi apparatus	Membrane	PredHel=1	N
GrGT47_36	Group C	484	56314.7	9.18	Golgi apparatus	Membrane	PredHel=1	N
GrGT47_37	Group C	459	53450.1	9.02	Endoplasmic reticulum	Membrane	PredHel=1	N
GrGT47_38	Group A	727	85245.4	6.19	Golgi apparatus	Membrane	PredHel=1	N
GrGT47_39	Group D	456	53083.3	9.8	Golgi apparatus	Membrane	PredHel=1	N
GrGT47_40	Group B	429	49787.4	8.91	Endoplasmic reticulum	Membrane	PredHel=1	N
GrGT47_41	Group A	507	59065	9.21	Golgi apparatus	Membrane	PredHel=2	N
GrGT47_42	Group C	482	54610	9.27	Endoplasmic reticulum	Membrane	PredHel=1	N
GrGT47_43	Group C	644	73626.2	5.59	Golgi apparatus	Membrane	PredHel=1	N
GrGT47_44	Group A	527	61016.5	6.05	Golgi apparatus	Membrane	PredHel=2	N
GrGT47_45	Group A	482	56130.5	9.45	Golgi apparatus	Membrane	PredHel=1	N
GrGT47_46	Group C	348	39633.2	5.8	Endoplasmic reticulum	Membrane	PredHel=0	Y
GrGT47_47	Group B	326	37982.7	9.66	Mitochondrion	Soluble	PredHel=0	N
GrGT47_48	Group C	493	56043.1	8.92	Golgi apparatus	Membrane	PredHel=1	N
GrGT47_49	Group C	474	54403.4	8.13	Endoplasmic reticulum	Membrane	PredHel=1	N
GrGT47_50	Group B	484	55712.7	9.53	Golgi apparatus	Membrane	PredHel=1	N
GrGT47_51	Group C	843	94948.8	5.67	Golgi apparatus	Membrane	PredHel=1	N
GrGT47_52	Group C	451	52196.4	9.45	Endoplasmic reticulum	Membrane	PredHel=1	N
GrGT47_53	Group D	437	50365.8	9.47	Golgi apparatus	Membrane	PredHel=1	N
GhGT47_01	Group B	377	43899.2	8.9	Cytoplasm	Soluble	PredHel=0	N
GhGT47_02	Group C	223	26104.5	9.78	Mitochondrion	Membrane	PredHel=0	N
GhGT47_03	Group C	477	53593.3	8.29	Golgi apparatus	Membrane	PredHel=1	N
GhGT47_04	Group B	478	53811.6	8.97	Golgi apparatus	Membrane	PredHel=1	N
GhGT47_05	Group E	454	52019.8	9.16	Golgi apparatus	Membrane	PredHel=0	N
GhGT47_06	Group C	443	50746	8.78	Golgi apparatus	Membrane	PredHel=1	N
GhGT47_07	Group A	449	51506.6	6.28	Extracellular	Soluble	PredHel=0	Y
GhGT47_08	Group B	429	49755.5	9.6	Endoplasmic reticulum	Membrane	PredHel=1	Y
GhGT47_09	Group D	412	47018.4	7.1	Endoplasmic reticulum	Soluble	PredHel=0	Y
GhGT47_10	Group A	475	54385.2	8.47	Golgi apparatus	Membrane	PredHel=1	N
GhGT47_11	Group B	481	54120.8	8.68	Golgi apparatus	Membrane	PredHel=1	N
GhGT47_12	Group A	443	51878.2	9.03	Plastid	Membrane	PredHel=0	N
GhGT47_13	Group C	634	72162.1	9.54	Golgi apparatus	Membrane	PredHel=0	N
GhGT47_14	Group C	449	51924.5	9.2	Peroxisome	Soluble	PredHel=0	N
GhGT47_15	Group C	433	50332.3	9.06	Endoplasmic reticulum	Membrane	PredHel=1	N
GhGT47_16	Group A	731	85659.8	6.1	Golgi apparatus	Membrane	PredHel=1	N
GhGT47_17	Group D	428	49985.9	9.94	Golgi apparatus	Membrane	PredHel=1	N
GhGT47_18	Group B	430	49666.3	9.1	Endoplasmic reticulum	Membrane	PredHel=1	Y
GhGT47_19	Group C	740	84912.2	8.89	Endoplasmic reticulum	Membrane	PredHel=6	N
GhGT47_20	Group C	644	73754.5	5.89	Golgi apparatus	Membrane	PredHel=0	N
GhGT47_21	Group C	641	73491.4	9.36	Golgi apparatus	Membrane	PredHel=1	N
GhGT47_22	Group A	600	69643.4	8.29	Golgi apparatus	Membrane	PredHel=1	N
GhGT47_23	Group A	579	66718	6.32	Golgi apparatus	Membrane	PredHel=1	N
GhGT47_24	Group C	521	59549	8.74	Endoplasmic reticulum	Membrane	PredHel=1	N
GhGT47_25	Group C	478	55459	9.14	Golgi apparatus	Membrane	PredHel=1	Y
GhGT47_26	Group C	405	46315.4	9.43	Peroxisome	Soluble	PredHel=0	N
GhGT47_27	Group B	498	56573.5	9.43	Golgi apparatus	Membrane	PredHel=1	N
GhGT47_28	Group C	525	61081.6	9.96	Golgi apparatus	Membrane	PredHel=1	N
GhGT47_29	Group A	504	58298.9	8.65	Golgi apparatus	Membrane	PredHel=1	N
GhGT47_30	Group C	463	53956.4	6.09	Golgi apparatus	Membrane	PredHel=1	N
GhGT47_31	Group F	793	90180.1	5.65	Golgi apparatus	Membrane	PredHel=1	N
GhGT47_32	Group C	575	64612.8	8.74	Golgi apparatus	Membrane	PredHel=1	N
GhGT47_33	Group A	470	54597.7	9.07	Golgi apparatus	Membrane	PredHel=1	N
GhGT47_34	Group A	530	61146.1	9.22	Endoplasmic reticulum	Membrane	PredHel=1	N
GhGT47_35	Group A	508	59015.1	9.21	Endoplasmic reticulum	Membrane	PredHel=2	N
GhGT47_36	Group A	501	58222.3	9.59	Endoplasmic reticulum	Membrane	PredHel=2	N
GhGT47_37	Group A	508	58343.4	5.64	Endoplasmic reticulum	Soluble	PredHel=2	N
GhGT47_38	Group C	349	39244.2	5.65	Extracellular	Soluble	PredHel=0	Y
GhGT47_39	Group A	467	54160.6	8.58	Endoplasmic reticulum	Membrane	PredHel=2	N
GhGT47_40	Group A	575	66219.4	7.07	Golgi apparatus	Membrane	PredHel=1	N
GhGT47_41	Group C	505	57815.3	8.84	Golgi apparatus	Membrane	PredHel=1	N
GhGT47_42	Group B	497	56807.2	9.02	Golgi apparatus	Membrane	PredHel=1	N
GhGT47_43	Group D	414	47179.7	8.29	Extracellular	Soluble	PredHel=1	Y
GhGT47_44	Group D	417	47637.1	6.22	Endoplasmic reticulum	Soluble	PredHel=0	Y
GhGT47_45	Group A	517	59391.7	9.18	Golgi apparatus	Membrane	PredHel=2	N
GhGT47_46	Group B	484	55583.6	9.5	Golgi apparatus	Membrane	PredHel=1	N
GhGT47_47	Group C	457	52345.9	6.78	Golgi apparatus	Membrane	PredHel=1	N
GhGT47_48	Group C	459	52479.3	9.34	Golgi apparatus	Membrane	PredHel=1	N
GhGT47_49	Group C	840	94944.7	5.28	Golgi apparatus	Membrane	PredHel=1	N
GhGT47_50	Group C	723	83276	9.38	Endoplasmic reticulum	Membrane	PredHel=7	N
GhGT47_51	Group D	438	50434	9.64	Golgi apparatus	Membrane	PredHel=1	N
GhGT47_52	Group B	377	43881.1	8.75	Cytoplasm	Soluble	PredHel=0	N
GhGT47_53	Group C	327	38434.7	9.55	Cytoplasm	Soluble	PredHel=0	N
GhGT47_54	Group C	541	61463.7	9.22	Golgi apparatus	Membrane	PredHel=1	N
GhGT47_55	Group B	478	53864.8	9.1	Golgi apparatus	Membrane	PredHel=1	N
GhGT47_56	Group E	454	52028.9	9.22	Golgi apparatus	Membrane	PredHel=0	N
GhGT47_57	Group B	429	49620.3	9.57	Endoplasmic reticulum	Membrane	PredHel=1	Y
GhGT47_58	Group D	412	47032.4	7.1	Endoplasmic reticulum	Soluble	PredHel=0	Y
GhGT47_59	Group A	475	54417.2	8.59	Golgi apparatus	Membrane	PredHel=1	N
GhGT47_60	Group B	468	52793.7	8.96	Golgi apparatus	Membrane	PredHel=1	N
GhGT47_61	Group B	480	54297.1	8.68	Golgi apparatus	Membrane	PredHel=1	N
GhGT47_62	Group B	482	54515.2	8.8	Golgi apparatus	Membrane	PredHel=1	N
GhGT47_63	Group C	423	48712.7	8.67	Golgi apparatus	Membrane	PredHel=1	N
GhGT47_64	Group B	511	58621.5	9.22	Golgi apparatus	Membrane	PredHel=1	N
GhGT47_65	Group A	300	34436.4	6.32	Cytoplasm	Soluble	PredHel=0	N
GhGT47_66	Group C	585	67026.3	9.55	Golgi apparatus	Membrane	PredHel=1	N
GhGT47_67	Group C	475	54944.2	9.04	Endoplasmic reticulum	Membrane	PredHel=1	N
GhGT47_68	Group C	459	53522.2	9.1	Endoplasmic reticulum	Membrane	PredHel=1	N
GhGT47_69	Group A	763	89230.9	6.35	Golgi apparatus	Membrane	PredHel=1	N
GhGT47_70	Group D	437	50794.5	9.71	Golgi apparatus	Membrane	PredHel=1	N
GhGT47_71	Group B	462	53449.8	9.27	Golgi apparatus	Membrane	PredHel=1	N
GhGT47_72	Group A	443	51810.2	9.02	Mitochondrion	Soluble	PredHel=0	N
GhGT47_73	Group C	482	54756	9.33	Endoplasmic reticulum	Membrane	PredHel=1	N
GhGT47_74	Group C	537	60688	5.31	Golgi apparatus	Membrane	PredHel=0	N
GhGT47_75	Group C	641	73435.2	9.4	Golgi apparatus	Membrane	PredHel=1	N
GhGT47_76	Group A	645	74398.8	7.81	Endoplasmic reticulum	Membrane	PredHel=1	N
GhGT47_77	Group A	579	66721.1	6.74	Golgi apparatus	Membrane	PredHel=1	N
GhGT47_78	Group C	527	60200.8	8.91	Golgi apparatus	Membrane	PredHel=1	N
GhGT47_79	Group C	479	55673.2	9	Golgi apparatus	Membrane	PredHel=1	N
GhGT47_80	Group C	411	47012.7	8.96	Endoplasmic reticulum	Soluble	PredHel=1	Y
GhGT47_81	Group B	494	56253	9.31	Golgi apparatus	Membrane	PredHel=1	N
GhGT47_82	Group C	557	64987.9	9.79	Mitochondrion	Membrane	PredHel=1	N
GhGT47_83	Group C	450	52318.7	6.31	Golgi apparatus	Membrane	PredHel=1	N
GhGT47_84	Group B	481	54945.9	9.28	Golgi apparatus	Membrane	PredHel=1	N
GhGT47_85	Group F	793	90323.2	5.73	Golgi apparatus	Membrane	PredHel=1	N
GhGT47_86	Group C	580	65169.2	8.96	Golgi apparatus	Membrane	PredHel=1	N
GhGT47_87	Group A	530	61173.3	9.43	Endoplasmic reticulum	Membrane	PredHel=1	N
GhGT47_88	Group A	278	32308.3	9.63	Nucleus	Soluble	PredHel=0	N
GhGT47_89	Group A	517	59651.8	5.93	Endoplasmic reticulum	Soluble	PredHel=2	N
GhGT47_90	Group A	472	55050.4	9.46	Golgi apparatus	Membrane	PredHel=1	N
GhGT47_91	Group C	342	38611.2	5.68	Extracellular	Soluble	PredHel=0	Y
GhGT47_92	Group B	448	51979.5	9.7	Golgi apparatus	Membrane	PredHel=1	N
GhGT47_93	Group A	467	54202.7	8.46	Endoplasmic reticulum	Membrane	PredHel=1	N
GhGT47_94	Group A	575	66307.6	7.51	Golgi apparatus	Membrane	PredHel=1	N
GhGT47_95	Group C	441	49918.2	8.08	Golgi apparatus	Membrane	PredHel=1	N
GhGT47_96	Group B	497	57026.3	8.85	Golgi apparatus	Membrane	PredHel=1	N
GhGT47_97	Group D	426	48562.5	8.74	Extracellular	Soluble	PredHel=1	Y
GhGT47_98	Group A	469	54121.4	9.09	Plastid	Soluble	PredHel=0	N
GhGT47_99	Group B	484	55631.7	9.55	Golgi apparatus	Membrane	PredHel=1	N
GhGT47_100	Group C	475	54455.5	8.39	Golgi apparatus	Membrane	PredHel=1	N
GhGT47_101	Group C	459	52388	9.04	Golgi apparatus	Membrane	PredHel=1	N
GhGT47_102	Group C	817	91174.9	5.1	Golgi apparatus	Membrane	PredHel=1	N
GhGT47_103	Group C	452	52037.2	9.45	Golgi apparatus	Membrane	PredHel=1	N
GhGT47_104	Group D	437	50415.8	9.46	Golgi apparatus	Membrane	PredHel=1	N
GhGT47_105	Group D	417	47589	6.22	Endoplasmic reticulum	Soluble	PredHel=0	Y
GbGT47_01	Group B	377	43899.2	8.9	Cytoplasm	Soluble	PredHel=0	N
GbGT47_02	Group C	340	40140.7	9.63	Mitochondrion	Soluble	PredHel=0	N
GbGT47_03	Group C	541	61417.7	9.27	Golgi apparatus	Membrane	PredHel=1	N
GbGT47_04	Group B	478	53827.6	8.97	Golgi apparatus	Membrane	PredHel=1	N
GbGT47_05	Group E	454	52005.8	9.16	Golgi apparatus	Membrane	PredHel=0	N
GbGT47_06	Group C	443	50746	8.78	Golgi apparatus	Membrane	PredHel=1	N
GbGT47_07	Group A	449	51532.7	6.28	Extracellular	Soluble	PredHel=0	Y
GbGT47_08	Group B	429	49707.5	9.6	Endoplasmic reticulum	Membrane	PredHel=1	Y
GbGT47_09	Group D	341	38784.8	6.08	Cytoplasm	Soluble	PredHel=0	N
GbGT47_10	Group A	475	54424.2	8.47	Golgi apparatus	Membrane	PredHel=1	N
GbGT47_11	Group B	444	49877.7	6.84	Golgi apparatus	Membrane	PredHel=1	N
GbGT47_12	Group A	443	51894.2	9.03	Plastid	Membrane	PredHel=0	N
GbGT47_13	Group A	761	89174.9	6.26	Golgi apparatus	Membrane	PredHel=1	N
GbGT47_14	Group D	437	51119.2	9.97	Golgi apparatus	Membrane	PredHel=1	N
GbGT47_15	Group B	415	47916.1	8.56	Endoplasmic reticulum	Membrane	PredHel=1	Y
GbGT47_16	Group C	747	85946.4	8.95	Endoplasmic reticulum	Membrane	PredHel=7	N
GbGT47_17	Group C	646	73956.6	5.89	Golgi apparatus	Membrane	PredHel=0	N
GbGT47_18	Group C	641	73376.2	9.29	Golgi apparatus	Membrane	PredHel=1	N
GbGT47_19	Group A	597	69228.9	8.11	Endoplasmic reticulum	Membrane	PredHel=1	N
GbGT47_20	Group A	579	66667	6.17	Golgi apparatus	Membrane	PredHel=1	N
GbGT47_21	Group C	521	59559.1	8.74	Endoplasmic reticulum	Membrane	PredHel=1	N
GbGT47_22	Group C	479	55606.2	9.25	Golgi apparatus	Membrane	PredHel=1	Y
GbGT47_23	Group C	467	53845.1	9.61	Endoplasmic reticulum	Membrane	PredHel=1	Y
GbGT47_24	Group B	498	56616.5	9.39	Golgi apparatus	Membrane	PredHel=1	N
GbGT47_25	Group A	535	61517.5	7.57	Golgi apparatus	Membrane	PredHel=1	N
GbGT47_26	Group C	463	53926.4	6.09	Golgi apparatus	Membrane	PredHel=1	N
GbGT47_27	Group B	511	58408.4	9.35	Golgi apparatus	Membrane	PredHel=1	N
GbGT47_28	Group F	793	90166	5.65	Golgi apparatus	Membrane	PredHel=1	N
GbGT47_29	Group C	575	64612.8	8.74	Golgi apparatus	Membrane	PredHel=1	N
GbGT47_30	Group A	483	56039.3	9.08	Golgi apparatus	Membrane	PredHel=1	N
GbGT47_31	Group A	530	61137.1	9.18	Endoplasmic reticulum	Membrane	PredHel=1	N
GbGT47_32	Group A	533	62038.5	9.19	Endoplasmic reticulum	Membrane	PredHel=2	N
GbGT47_33	Group A	513	59628.8	9.53	Endoplasmic reticulum	Membrane	PredHel=2	N
GbGT47_34	Group A	519	59592.7	5.93	Endoplasmic reticulum	Soluble	PredHel=2	N
GbGT47_35	Group A	194	21960	8.97	Nucleus	Soluble	PredHel=0	N
GbGT47_36	Group C	348	39506.1	5.61	Extracellular	Soluble	PredHel=0	Y
GbGT47_37	Group A	467	54160.6	8.58	Endoplasmic reticulum	Membrane	PredHel=2	N
GbGT47_38	Group A	488	56183.6	8.93	Golgi apparatus	Membrane	PredHel=1	N
GbGT47_39	Group C	505	57847.4	8.84	Golgi apparatus	Membrane	PredHel=1	N
GbGT47_40	Group B	497	56953.3	9.1	Golgi apparatus	Membrane	PredHel=1	N
GbGT47_41	Group D	413	47076.6	8.32	Extracellular	Soluble	PredHel=1	Y
GbGT47_42	Group D	417	47637.1	6.22	Endoplasmic reticulum	Soluble	PredHel=0	Y
GbGT47_43	Group A	517	59391.7	9.18	Golgi apparatus	Membrane	PredHel=2	N
GbGT47_44	Group B	484	55583.6	9.5	Golgi apparatus	Membrane	PredHel=1	N
GbGT47_45	Group C	457	52343	8.63	Golgi apparatus	Membrane	PredHel=1	N
GbGT47_46	Group C	459	52479.3	9.34	Golgi apparatus	Membrane	PredHel=1	N
GbGT47_47	Group D	437	50350	9.61	Golgi apparatus	Membrane	PredHel=1	N
GbGT47_48	Group B	377	43854.1	8.75	Cytoplasm	Soluble	PredHel=0	N
GbGT47_49	Group C	357	41986.6	9.55	Peroxisome	Soluble	PredHel=0	N
GbGT47_50	Group C	541	61463.7	9.22	Golgi apparatus	Membrane	PredHel=1	N
GbGT47_51	Group B	478	53832.7	9.15	Golgi apparatus	Membrane	PredHel=1	N
GbGT47_52	Group E	454	52096	9.21	Golgi apparatus	Membrane	PredHel=0	N
GbGT47_53	Group B	429	49620.3	9.57	Endoplasmic reticulum	Membrane	PredHel=1	Y
GbGT47_54	Group D	412	47032.4	7.1	Endoplasmic reticulum	Soluble	PredHel=0	Y
GbGT47_55	Group A	475	54421.2	8.59	Golgi apparatus	Membrane	PredHel=1	N
GbGT47_56	Group B	481	54233.9	8.55	Golgi apparatus	Membrane	PredHel=1	N
GbGT47_57	Group C	435	50010.2	8.78	Golgi apparatus	Membrane	PredHel=1	N
GbGT47_58	Group B	513	58735.6	9.39	Golgi apparatus	Membrane	PredHel=1	N
GbGT47_59	Group A	449	51536.7	6.17	Extracellular	Soluble	PredHel=0	Y
GbGT47_60	Group C	593	67982.5	9.6	Golgi apparatus	Membrane	PredHel=1	N
GbGT47_61	Group C	484	56088.3	9.12	Endoplasmic reticulum	Membrane	PredHel=1	N
GbGT47_62	Group C	459	53464.2	9.16	Endoplasmic reticulum	Membrane	PredHel=1	N
GbGT47_63	Group A	763	89172.9	6.46	Golgi apparatus	Membrane	PredHel=1	N
GbGT47_64	Group D	456	53055.3	9.8	Golgi apparatus	Membrane	PredHel=1	N
GbGT47_65	Group B	430	49854.5	8.9	Endoplasmic reticulum	Membrane	PredHel=1	Y
GbGT47_66	Group A	517	60014.9	9.13	Endoplasmic reticulum	Membrane	PredHel=1	N
GbGT47_67	Group C	482	54748.1	9.43	Endoplasmic reticulum	Membrane	PredHel=1	N
GbGT47_68	Group C	646	73808.5	5.61	Golgi apparatus	Membrane	PredHel=0	N
GbGT47_69	Group C	641	73547.4	9.47	Golgi apparatus	Membrane	PredHel=1	N
GbGT47_70	Group A	645	74544.1	8.05	Golgi apparatus	Membrane	PredHel=1	N
GbGT47_71	Group A	579	66709.1	6.74	Golgi apparatus	Membrane	PredHel=1	N
GbGT47_72	Group C	527	60200.8	8.91	Golgi apparatus	Membrane	PredHel=1	N
GbGT47_73	Group C	479	55673.2	9	Golgi apparatus	Membrane	PredHel=1	N
GbGT47_74	Group C	470	54218.5	9.59	Endoplasmic reticulum	Membrane	PredHel=1	Y
GbGT47_75	Group B	497	56584.4	9.31	Golgi apparatus	Membrane	PredHel=1	N
GbGT47_76	Group C	557	65000	9.8	Mitochondrion	Membrane	PredHel=1	N
GbGT47_77	Group A	511	58792.7	8.8	Golgi apparatus	Membrane	PredHel=1	N
GbGT47_78	Group C	463	53747.2	6.34	Golgi apparatus	Membrane	PredHel=1	N
GbGT47_79	Group B	508	58214.3	9.34	Golgi apparatus	Membrane	PredHel=1	N
GbGT47_80	Group F	764	86793	5.57	Golgi apparatus	Membrane	PredHel=1	N
GbGT47_81	Group C	580	65204.3	8.96	Golgi apparatus	Membrane	PredHel=1	N
GbGT47_82	Group A	483	56003.3	9.03	Golgi apparatus	Membrane	PredHel=1	N
GbGT47_83	Group A	523	60064.1	9.46	Endoplasmic reticulum	Membrane	PredHel=1	N
GbGT47_84	Group A	289	33713.9	9.9	Mitochondrion	Soluble	PredHel=0	N
GbGT47_85	Group A	517	59651.8	5.93	Endoplasmic reticulum	Soluble	PredHel=2	N
GbGT47_86	Group A	472	55059.3	9.5	Golgi apparatus	Membrane	PredHel=1	N
GbGT47_87	Group C	294	33523.2	5.44	Cytoplasm	Soluble	PredHel=1	N
GbGT47_88	Group A	467	54315.8	8.46	Endoplasmic reticulum	Membrane	PredHel=2	N
GbGT47_89	Group A	575	66277.7	7.9	Golgi apparatus	Membrane	PredHel=1	N
GbGT47_90	Group C	478	54470.5	8.46	Golgi apparatus	Membrane	PredHel=1	N
GbGT47_91	Group B	497	57026.3	8.85	Golgi apparatus	Membrane	PredHel=1	N
GbGT47_92	Group D	442	50198.2	8.29	Endoplasmic reticulum	Soluble	PredHel=1	N
GbGT47_93	Group D	417	47562	6.22	Endoplasmic reticulum	Soluble	PredHel=0	Y
GbGT47_94	Group A	517	59380.7	9.19	Endoplasmic reticulum	Membrane	PredHel=2	N
GbGT47_95	Group B	468	53565.3	9.14	Golgi apparatus	Membrane	PredHel=1	N
GbGT47_96	Group C	475	54543.5	7.73	Golgi apparatus	Membrane	PredHel=1	N
GbGT47_97	Group C	488	55664	9.18	Endoplasmic reticulum	Membrane	PredHel=1	N
GbGT47_98	Group C	656	74885.6	5.53	Golgi apparatus	Membrane	PredHel=1	N
GbGT47_99	Group C	732	84116.8	9.35	Endoplasmic reticulum	Membrane	PredHel=7	N
GbGT47_100	Group D	433	49964.3	9.42	Golgi apparatus	Membrane	PredHel=1	N
GbGT47_101	Group C	634	72144.1	9.54	Golgi apparatus	Membrane	PredHel=0	N
GbGT47_102	Group C	516	59959.2	9.85	Golgi apparatus	Membrane	PredHel=1	N
GbGT47_103	Group C	565	65346	9.38	Endoplasmic reticulum	Membrane	PredHel=5	N
GbGT47_104	Group C	452	52192.5	9.49	Golgi apparatus	Membrane	PredHel=1	N
GbGT47_105	Group C	452	52192.5	9.49	Golgi apparatus	Membrane	PredHel=1	N
GbGT47_106	Group C	840	94947.7	5.35	Golgi apparatus	Membrane	PredHel=1	N
GbGT47_107	Group A	289	33713.9	9.9	Mitochondrion	Soluble	PredHel=0	N
GbGT47_108	Group C	460	53469	8.94	Endoplasmic reticulum	Membrane	PredHel=1	N
GbGT47_109	Group C	484	56105.4	9.03	Endoplasmic reticulum	Membrane	PredHel=1	N
